# Supplementary material for: Functional categorization of de novo transcriptome assembly of Vanilla planifolia Jacks. potentially points to a translational regulation during early stages of infection by Fusarium oxysporum f. sp. vanillae
Source: BMC Genomics. 2019 Nov 8;20:826. doi: 10.1186/s12864-019-6229-5 (PMC6839141; doi:10.1186/s12864-019-6229-5)
Supplement: Supplementary file 7 — Additional file 7: Table S4. Functional annotation of DEGs at 2 and 10 dpi obtained with the EdgeR method. [file 12864_2019_6229_MOESM7_ESM.xlsx]

## Sheet: Additional file 3 Table S2
Down Regulated	Unigenes	ID Arabidopsis	Annotation	logFC 2 dpi	logFC 10 dpi
	TRINITY_DN13643_c0_g1_i1	AT5G49690.1	UDP-Glycosyltransferasesuperfamilyprotein	-9.92521	0
	TRINITY_DN65246_c0_g1_i6	AT1G70440.1	SRO3 | similar to RCD one 3	-9.88868	0
	TRINITY_DN63876_c0_g1_i8	AT3G07970.1	QRT2 | Pectin lyase-like superfamily protein	-9.88251	0
	TRINITY_DN64387_c1_g1_i2	AT5G17420.1	IRX3, CESA7, ATCESA7, MUR10 | Cellulose synthase family protein	-9.80596	0
	TRINITY_DN63863_c0_g1_i2	AT5G18830.2	SPL7 | squamosa promoter binding protein-like 7	-9.77861	0
	TRINITY_DN66315_c0_g2_i1	AT5G04930.1	ALA1 | aminophospholipid ATPase 1	-9.59414	0
	TRINITY_DN64347_c0_g1_i5	AT1G76160.1	sks5 | SKU5 similar 5	-9.43975	0
	TRINITY_DN66332_c0_g2_i8	AT5G45140.1	NRPC2 | nuclear RNA polymerase C2	-9.33315	0
	TRINITY_DN66187_c0_g6_i10	AT4G05420.2	DDB1A | damaged DNA binding protein 1A	-9.32974	0
	TRINITY_DN55988_c0_g1_i1	AT1G28520.2	VOZ1 | vascular plant one zinc finger protein	-9.09868	0
	TRINITY_DN55988_c0_g1_i1	AT1G28520.2	VOZ1 | vascular plant one zinc finger protein	-9.09868	0
	TRINITY_DN63540_c0_g1_i11	AT4G01040.1	Glycosyl hydrolase superfamily protein	-9.03782	0
	TRINITY_DN64517_c0_g2_i1	AT5G11240.1	transducin family protein / WD-40 repeat family protein	-8.93951	0
	TRINITY_DN58993_c0_g1_i2	AT3G02645.1	Plant protein of unknown function (DUF247)	-8.81376	0
	TRINITY_DN59124_c0_g1_i3	AT4G28250.1	ATEXPB3, EXPB3, ATHEXP BETA 1.6 | expansin B3	-8.69571	0
	TRINITY_DN64290_c0_g1_i9	AT2G47180.1	AtGolS1, GolS1 | galactinol synthase 1	-8.56339	0
	TRINITY_DN64387_c1_g1_i8	AT5G17420.1	IRX3, CESA7, ATCESA7, MUR10 | Cellulose synthase family protein	-8.47131	0
	TRINITY_DN58334_c0_g1_i5	AT1G31600.2	RNA-binding (RRM/RBD/RNP motifs) family protein	-8.28544	0
	TRINITY_DN54718_c0_g1_i2	AT5G01230.1	S-adenosyl-L-methionine-dependent methyltransferases superfamily protein	-8.24062	0
	TRINITY_DN63940_c0_g1_i3	AT1G48100.1	Pectin lyase-like superfamily protein	-8.2236	0
	TRINITY_DN65451_c0_g1_i1	AT1G13030.1	sphere organelles protein-related	-8.10617	0
	TRINITY_DN64510_c0_g1_i1	AT5G52060.1	ATBAG1, BAG1 | BCL-2-associated athanogene 1	-8.0998	0
	TRINITY_DN52123_c0_g1_i2	AT4G11120.1	translation elongation factor Ts (EF-Ts), putative	-7.98755	0
	TRINITY_DN52123_c0_g1_i2	AT4G11120.1	translation elongation factor Ts (EF-Ts), putative	-7.98755	0
	TRINITY_DN58067_c0_g2_i11	AT1G28510.1	Optic atrophy 3 protein (OPA3)	-7.97518	0
	TRINITY_DN53548_c0_g1_i1	AT1G57560.1	AtMYB50, MYB50 | myb domain protein 50	-7.80836	0
	TRINITY_DN65632_c1_g2_i4	AT3G04680.2	CLPS3 | CLP-similar protein 3	-7.78693	0
	TRINITY_DN44034_c0_g1_i1	AT4G22000.1	unknownprotein	-7.78536	0
	TRINITY_DN48812_c0_g1_i3	AT2G20980.1	MCM10 | minichromosome maintenance 10	-7.76052	0
	TRINITY_DN65911_c0_g1_i5	AT1G75450.2	CKX5 | cytokinin oxidase 5	-7.75952	0
	TRINITY_DN63189_c0_g1_i3	AT1G22170.1	Phosphoglycerate mutase family protein	-7.74632	0
	TRINITY_DN57452_c0_g1_i2	AT4G29810.1	ATMKK2, MKK2, MK1 | MAP kinase kinase 2	-7.74151	0
	TRINITY_DN57452_c0_g1_i2	AT4G29810.1	ATMKK2, MKK2, MK1 | MAP kinase kinase 2	-7.74151	0
	TRINITY_DN65018_c0_g1_i5	AT3G25500.1	AFH1, FH1, AHF1, ATFH1 | formin homology 1 "	-7.73505	0
	TRINITY_DN66314_c0_g1_i1	AT4G23540.1	ARM repeat superfamily protein	-7.70833	0
	TRINITY_DN64154_c0_g1_i4	AT3G07670.1	Rubisco methyltransferase family protein	-7.68763	0
	TRINITY_DN64774_c0_g1_i5	AT1G03620.1	ELMO/CED-12 family protein	-7.68394	0
	TRINITY_DN46681_c0_g1_i2	AT1G62340.1	ALE1,ALE|PA-domaincontainingsubtilasefamilyprotein	-7.64224	0
	TRINITY_DN63983_c0_g1_i2	AT1G51340.2	MATE efflux family protein	-7.63505	0
	TRINITY_DN43149_c0_g1_i2	AT5G19740.1	PeptidaseM28familyprotein	-7.62104	0
	TRINITY_DN65829_c1_g1_i7	AT4G21390.1	B120 | S-locus lectin protein kinase family protein	-7.61333	0
	TRINITY_DN58817_c0_g1_i2	AT3G15070.2	RING/U-box superfamily protein	-7.58092	0
	TRINITY_DN58817_c0_g1_i2	AT3G15070.2	RING/U-box superfamily protein	-7.58092	0
	TRINITY_DN57034_c0_g1_i1	AT1G63100.1	GRAS family transcription factor	-7.57701	0
	TRINITY_DN63795_c0_g1_i4	AT4G38050.1	Xanthine/uracil permease family protein	-7.55089	0
	TRINITY_DN64156_c0_g1_i2	AT1G32740.1	SBP (S-ribonuclease binding protein) family protein	-7.51842	0
	TRINITY_DN58092_c0_g2_i1	AT5G66750.1	DDM1, CHR01, CHR1, CHA1, SOM4, SOM1, ATDDM1 | chromatin remodeling 1	-7.51541	0
	TRINITY_DN57211_c0_g1_i2	AT1G54820.1	Protein kinase superfamily protein	-7.46319	0
	TRINITY_DN57211_c0_g1_i2	AT1G54820.1	Protein kinase superfamily protein	-7.46319	0
	TRINITY_DN57314_c0_g1_i1	AT3G05675.1	BTB/POZ domain-containing protein	-7.42548	0
	TRINITY_DN53143_c0_g1_i1	AT2G26170.2	CYP711A1 | cytochrome P450, family 711, subfamily A, polypeptide 1	-7.42238	0
	TRINITY_DN63476_c0_g3_i8	AT3G02690.1	nodulin MtN21 /EamA-like transporter family protein	-7.39379	0
	TRINITY_DN57157_c0_g1_i1	AT1G75500.2	WAT1 | Walls Are Thin 1	-7.36721	0
	TRINITY_DN64542_c0_g1_i2	AT4G19191.1	Tetratricopeptide repeat (TPR)-like superfamily protein	-7.36701	0
	TRINITY_DN47476_c0_g1_i3	AT3G05800.1	AIF1|AtBS1(activation-taggedBRI1suppressor1)-interactingfactor1	-7.36631	0
	TRINITY_DN64881_c0_g1_i3	AT4G32050.1	neurochondrin family protein	-7.30746	0
	TRINITY_DN63346_c0_g1_i9	AT1G79620.1	Leucine-rich repeat protein kinase family protein	-7.29802	0
	TRINITY_DN63679_c0_g1_i2	AT1G76520.2	Auxin efflux carrier family protein	-7.25808	0
	TRINITY_DN63804_c0_g1_i1	AT4G05150.1	Octicosapeptide/Phox/Bem1p family protein	-7.22982	0
	TRINITY_DN64556_c0_g1_i1	AT3G18670.1	Ankyrin repeat family protein	-7.20624	0
	TRINITY_DN66105_c0_g1_i8	AT3G02840.1	ARM repeat superfamily protein	-7.10029	0
	TRINITY_DN55222_c0_g1_i3	AT3G55820.1	Fasciclin-like arabinogalactan family protein	-7.07216	0
	TRINITY_DN57539_c0_g1_i4	AT5G38520.1	alpha/beta-Hydrolases superfamily protein	-7.0372	0
	TRINITY_DN57539_c0_g1_i4	AT5G38520.1	alpha/beta-Hydrolases superfamily protein	-7.0372	0
	TRINITY_DN64632_c0_g1_i8	AT5G14620.1	DRM2, DMT7 | domains rearranged methyltransferase 2	-7.00384	0
	TRINITY_DN66035_c2_g1_i2	AT1G63430.1	Leucine-rich repeat protein kinase family protein	-6.97313	0
	TRINITY_DN55366_c0_g1_i5	AT1G68730.1	Zim17-type zinc finger protein	-6.93827	0
	TRINITY_DN55366_c0_g1_i5	AT1G68730.1	Zim17-type zinc finger protein	-6.93827	0
	TRINITY_DN64295_c0_g1_i4	AT1G68930.1	pentatricopeptide (PPR) repeat-containing protein	-6.93803	0
	TRINITY_DN55080_c0_g2_i3	AT3G49940.1	LBD38 | LOB domain-containing protein 38	-6.89318	0
	TRINITY_DN65714_c2_g1_i2	AT3G12670.1	emb2742 | CTP synthase family protein	-6.88541	0
	TRINITY_DN47612_c0_g1_i3	AT1G52740.1	HTA9|histoneH2Aprotein9	-6.86373	0
	TRINITY_DN58768_c0_g1_i2	AT1G48570.1	zinc finger (Ran-binding) family protein	-6.843	0
	TRINITY_DN58768_c0_g1_i2	AT1G48570.1	zinc finger (Ran-binding) family protein	-6.843	0
	TRINITY_DN66491_c0_g1_i7	AT1G11330.1	S-locus lectin protein kinase family protein |	-6.83484	0
	TRINITY_DN55954_c0_g1_i2	AT3G07080.1	EamA-like transporter family	-6.80888	0
	TRINITY_DN44161_c0_g1_i1	AT4G01130.1	GDSL-likeLipase/Acylhydrolasesuperfamilyprotein	-6.78831	0
	TRINITY_DN65833_c0_g1_i2	AT1G67930.1	Golgi transport complex protein-related	-6.77327	0
	TRINITY_DN63489_c0_g1_i6	AT1G01140.1	CIPK9, SnRK3.12, PKS6 | CBL-interacting protein kinase 9	-6.73677	0
	TRINITY_DN66017_c0_g1_i1	AT1G63300.1	Myosin heavy chain-related protein	-6.73065	0
	TRINITY_DN63167_c0_g1_i2	AT4G21070.1	ATBRCA1, BRCA1 | breast cancer susceptibility1	-6.72677	0
	TRINITY_DN65946_c1_g1_i6	AT5G13050.1	5-FCL | 5-formyltetrahydrofolate cycloligase	-6.62491	0
	TRINITY_DN53480_c0_g2_i7	AT2G30933.2	Carbohydrate-binding X8 domain superfamily protein	-6.61942	0
	TRINITY_DN65714_c2_g1_i8	AT3G12670.1	emb2742 | CTP synthase family protein	-6.61163	0
	TRINITY_DN52065_c0_g1_i1	AT1G79620.1	Leucine-rich repeat protein kinase family protein	-6.58287	0
	TRINITY_DN57690_c0_g1_i4	AT5G46860.1	VAM3, ATVAM3, SYP22, ATSYP22, SGR3 | Syntaxin/t-SNARE family protein	-6.5816	0
	TRINITY_DN50595_c0_g2_i1	AT5G65640.2	bHLH093 | beta HLH protein 93	-6.54859	0
	TRINITY_DN63991_c0_g1_i3	AT1G12420.1	ACR8 | ACT domain repeat 8	-6.54185	0
	TRINITY_DN66122_c0_g1_i5	AT5G03760.1	ATCSLA09, CSLA09, ATCSLA9, CSLA9, RAT4 | Nucleotide-diphospho-sugar transferases superfamily protein	-6.53447	0
	TRINITY_DN65353_c0_g2_i3	AT4G30980.1	LRL2 | LJRHL1-like 2	-6.5129	0
	TRINITY_DN56491_c0_g1_i5	AT3G15140.1	Polynucleotidyl transferase, ribonuclease H-like superfamily protein	-6.50481	0
	TRINITY_DN55871_c0_g1_i2	AT2G25950.1	Protein of unknown function (DUF1000)	-6.46519	0
	TRINITY_DN55871_c0_g1_i2	AT2G25950.1	Protein of unknown function (DUF1000)	-6.46519	0
	TRINITY_DN54413_c0_g1_i3	AT5G66650.1	Protein of unknown function (DUF607)	-6.38764	0
	TRINITY_DN54413_c0_g1_i3	AT5G66650.1	Protein of unknown function (DUF607)	-6.38764	0
	TRINITY_DN65776_c0_g1_i8	AT3G55080.1	SET domain-containing protein	-6.35015	0
	TRINITY_DN97652_c0_g1_i1	AT1G33920.1	ATPP2-A4, PP2-A4 | phloem protein 2-A4	-6.3369	0
	TRINITY_DN64275_c0_g1_i3	AT1G76730.1	NagB/RpiA/CoA transferase-like superfamily protein	-6.31352	0
	TRINITY_DN63785_c0_g1_i4	AT1G10830.2	Z-ISO, Z-ISO1.2 | 15-cis-zeta-carotene isomerase	-6.30235	0
	TRINITY_DN64329_c0_g1_i7	AT3G62080.1	SNF7 family protein	-6.30156	0
	TRINITY_DN64426_c0_g1_i4	AT4G21470.1	ATFMN/FHY, FMN/FHY | riboflavin kinase/FMN hydrolase	-6.29982	0
	TRINITY_DN50893_c0_g1_i1	AT1G48405.1	Kinase interacting (KIP1-like) family protein	-6.29898	0
	TRINITY_DN50893_c0_g1_i1	AT1G48405.1	Kinase interacting (KIP1-like) family protein	-6.29898	0
	TRINITY_DN54791_c0_g1_i4	AT2G02500.1	ISPD, ATMEPCT, MCT | Nucleotide-diphospho-sugar transferases superfamily protein	-6.2499	0
	TRINITY_DN55554_c0_g1_i3	AT3G12300.1	unknown protein	-6.23303	0
	TRINITY_DN64249_c2_g2_i5	AT5G23960.1	ATTPS21, TPS21 | terpene synthase 21	-6.15382	0
	TRINITY_DN53405_c0_g1_i1	AT1G11260.1	STP1, ATSTP1 | sugar transporter 1	-5.96184	0
	TRINITY_DN46469_c0_g1_i2	AT5G60920.1	COB|COBRA-likeextracellularglycosyl-phosphatidylinositol-anchoredproteinfamily	-5.93157	0
	TRINITY_DN56596_c0_g1_i1	AT1G09000.1	ANP1, MAPKKK1, NP1 | NPK1-related protein kinase 1	-5.78957	0
	TRINITY_DN66202_c0_g1_i18	AT3G16230.3	Predicted eukaryotic LigT	-5.64999	0
	TRINITY_DN53672_c0_g1_i2	AT5G16250.1	unknown protein	-5.47047	0
	TRINITY_DN39633_c0_g1_i1	AT4G33720.1	CAP(Cysteine-richsecretoryproteins,Antigen5,andPathogenesis-related1protein)superfamilyprotein	-5.06095	0
	TRINITY_DN52800_c0_g1_i6	AT2G01940.1	SGR5, ATIDD15 | C2H2-like zinc finger protein	-4.92517	0
	TRINITY_DN52800_c0_g1_i6	AT2G01940.1	SGR5, ATIDD15 | C2H2-like zinc finger protein	-4.92517	0
	TRINITY_DN54439_c0_g2_i1	AT3G21360.1	2-oxoglutarate (2OG) and Fe(II)-dependent oxygenase superfamily protein	-4.84032	0
	TRINITY_DN65083_c0_g1_i3	AT4G36390.1	Methylthiotransferase	-4.83343	0
	TRINITY_DN58877_c1_g1_i1	AT5G65780.1	ATBCAT-5 | branched-chain amino acid aminotransferase 5 / branched-chain amino acid transaminase 5 (BCAT5)	-4.81392	0
	TRINITY_DN55068_c0_g1_i2	AT4G01850.2	SAM-2, MAT2, SAM2, AtSAM2 | S-adenosylmethionine synthetase 2	-4.73346	0
	TRINITY_DN2078_c0_g1_i1	AT2G40590.1	RibosomalproteinS26efamilyprotein	-4.65704	0
	TRINITY_DN52657_c0_g1_i1	AT3G23250.2	MYB15, ATY19, ATMYB15 | myb domain protein 15	-4.63474	0
	TRINITY_DN56518_c0_g1_i1	AT1G08500.1	ENODL18, AtENODL18 | early nodulin-like protein 18	-4.57384	0
	TRINITY_DN56518_c0_g1_i1	AT1G08500.1	ENODL18, AtENODL18 | early nodulin-like protein 18 |	-4.57384	0
	TRINITY_DN51267_c0_g1_i1	AT1G08560.1	SYP111, KN, ATSYP111 | syntaxin of plants 111	-4.54203	0
	TRINITY_DN51267_c0_g1_i1	AT1G08560.1	SYP111, KN, ATSYP111 | syntaxin of plants 111	-4.54203	0
	TRINITY_DN53154_c0_g1_i1	AT3G20820.1	Leucine-rich repeat (LRR) family protein	-4.53261	0
	TRINITY_DN49351_c0_g1_i1	AT5G62360.1	Plant invertase/pectin methylesterase inhibitor superfamily protein	-4.4797	0
	TRINITY_DN65686_c0_g1_i6	AT4G16730.1	TPS02 | terpene synthase 02	-4.46496	0
	TRINITY_DN53672_c0_g1_i1	AT5G16250.1	unknown protein	-4.45138	0
	TRINITY_DN63591_c0_g1_i1	AT1G12240.1	ATBETAFRUCT4, VAC-INV | Glycosyl hydrolases family 32 protein	-4.45089	0
	TRINITY_DN54728_c0_g1_i1	AT3G14740.2	RING/FYVE/PHD zinc finger superfamily protein	-4.4389	0
	TRINITY_DN64604_c0_g2_i6	AT1G70940.1	PIN3, ATPIN3 | Auxin efflux carrier family protein	-4.39903	0
	TRINITY_DN50690_c0_g1_i1	AT5G67020.1	unknown protein	-4.28474	0
	TRINITY_DN46692_c0_g1_i1	AT5G17420.1	IRX3,CESA7,ATCESA7,MUR10|Cellulosesynthasefamilyprotein	-4.27344	0
	TRINITY_DN52110_c0_g1_i1	AT5G46280.1	MCM3 | Minichromosome maintenance (MCM2/3/5) family protein	-4.18283	0
	TRINITY_DN50712_c0_g1_i1	AT5G05290.1	ATEXPA2, EXP2, ATEXP2, ATHEXP ALPHA 1.12, EXPA2 | expansin A2	-4.16631	0
	TRINITY_DN46789_c0_g1_i1	AT5G51600.1	PLE,ATMAP65-3,MAP65-3|Microtubuleassociatedprotein(MAP65/ASE1)familyprotein	-4.15161	0
	TRINITY_DN19851_c0_g1_i1	AT5G05340.1	Peroxidasesuperfamilyprotein	-4.12822	0
	TRINITY_DN53934_c0_g1_i1	AT4G39330.1	ATCAD9, CAD9 | cinnamyl alcohol dehydrogenase 9	-4.1201	0
	TRINITY_DN58977_c1_g1_i1	AT3G50760.1	GATL2 | galacturonosyltransferase-like 2	-4.11455	0
	TRINITY_DN66309_c0_g1_i1	AT5G17420.1	IRX3, CESA7, ATCESA7, MUR10 | Cellulose synthase family protein	-4.08633	0
	TRINITY_DN54778_c0_g1_i1	AT5G42050.1	DCD (Development and Cell Death) domain protein	-4.07507	0
	TRINITY_DN40788_c0_g1_i1	AT5G20260.1	Exostosinfamilyprotein	-4.06638	0
	TRINITY_DN50893_c0_g1_i2	AT1G48405.1	Kinase interacting (KIP1-like) family protein	-4.05163	0
	TRINITY_DN63924_c0_g1_i3	AT1G15520.1	PDR12, ATPDR12, ABCG40, ATABCG40 | pleiotropic drug resistance 12	-4.02923	0
	TRINITY_DN54674_c0_g1_i1	AT5G16080.1	AtCXE17, CXE17 | carboxyesterase 17	-4.01208	0
	TRINITY_DN54674_c0_g1_i1	AT5G16080.1	AtCXE17, CXE17 | carboxyesterase 17	-4.01208	0
	TRINITY_DN66445_c0_g1_i4	AT5G64570.1	XYL4, ATBXL4 | beta-D-xylosidase 4	-4.00804	0
	TRINITY_DN54164_c0_g1_i2	AT1G20190.1	ATEXPA11, EXP11, ATEXP11, ATHEXP ALPHA 1.14, EXPA11 | expansin 11	-3.97909	0
	TRINITY_DN55670_c0_g1_i1	AT4G28310.1	unknown protein	-3.9769	0
	TRINITY_DN53107_c0_g1_i1	AT3G20820.1	Leucine-rich repeat (LRR) family protein	-3.92889	0
	TRINITY_DN45618_c0_g1_i1	AT2G47550.1	Plantinvertase/pectinmethylesteraseinhibitorsuperfamily	-3.92814	0
	TRINITY_DN66567_c0_g1_i3	AT3G25570.2	Adenosylmethionine decarboxylase family protein	-3.92323	0
	TRINITY_DN40101_c0_g1_i1	AT5G20110.1	Dyneinlightchaintype1familyprotein	-3.9177	0
	TRINITY_DN66192_c0_g1_i3	AT4G32730.2	PC-MYB1, MYB3R-1, ATMYB3R-1, ATMYB3R1 | Homeodomain-like protein	-3.91026	0
	TRINITY_DN56558_c0_g1_i2	AT5G10100.1	TPPI | Haloacid dehalogenase-like hydrolase (HAD) superfamily protein	-3.81826	0
	TRINITY_DN58887_c0_g1_i1	AT2G30890.1	Cytochrome b561/ferric reductase transmembrane protein family	-3.77193	0
	TRINITY_DN58887_c0_g1_i1	AT2G30890.1	Cytochrome b561/ferric reductase transmembrane protein family	-3.77193	0
	TRINITY_DN46822_c0_g1_i1	AT1G44110.1	CYCA1;1|CyclinA1;1	-3.76535	0
	TRINITY_DN65895_c0_g1_i8	AT1G22540.1	Major facilitator superfamily protein	-3.64489	0
	TRINITY_DN55213_c0_g2_i1	AT3G08500.1	MYB83, AtMYB83 | myb domain protein 83	-3.63245	0
	TRINITY_DN17877_c0_g1_i1	1AT1G21910.1	DREB26|Integrase-typeDNA-bindingsuperfamilyprotein	-3.62903	0
	TRINITY_DN52497_c0_g1_i1	AT2G06850.1	EXGT-A1, EXT, XTH4 | xyloglucan endotransglucosylase/hydrolase 4	-3.6023	0
	TRINITY_DN52497_c0_g1_i1	AT2G06850.1	EXGT-A1, EXT, XTH4 | xyloglucan endotransglucosylase/hydrolase 4	-3.6023	0
	TRINITY_DN55945_c0_g1_i1	AT3G60580.1	C2H2-like zinc finger protein	-3.58185	0
	TRINITY_DN58004_c0_g1_i1	AT3G08030.1	Protein of unknown function, DUF642	-3.57857	0
	TRINITY_DN57568_c0_g1_i1	AT1G21070.1	Nucleotide-sugar transporter family protein	-3.56348	0
	TRINITY_DN51373_c0_g1_i1	AT2G47140.1	NAD(P)-binding Rossmann-fold superfamily protein	-3.52989	0
	TRINITY_DN58626_c0_g2_i3	AT1G19180.1	JAZ1, TIFY10A | jasmonate-zim-domain protein 1	-3.48077	0
	TRINITY_DN55068_c0_g1_i1	AT4G01850.2	SAM-2, MAT2, SAM2, AtSAM2 | S-adenosylmethionine synthetase 2	-3.4663	0
	TRINITY_DN52357_c0_g1_i5	AT5G45970.1	ARAC2, RAC2, ROP7, ATRAC2, ATROP7 | RAC-like 2	-3.45908	0
	TRINITY_DN57966_c0_g1_i1	AT3G54820.1	PIP2D, PIP2;5 | plasma membrane intrinsic protein 2;5	-3.42563	0
	TRINITY_DN57966_c0_g1_i1	AT3G54820.1	PIP2D, PIP2;5 | plasma membrane intrinsic protein 2;5	-3.42563	0
	TRINITY_DN66736_c0_g1_i6	AT1G68570.1	Major facilitator superfamily protein	-3.41043	0
	TRINITY_DN58302_c0_g1_i1	AT2G21790.1	R1, RNR1, CLS8, ATRNR1 | ribonucleotide reductase 1	-3.40441	0
	TRINITY_DN48486_c0_g1_i1	AT5G41380.1	CCT motif family protein	-3.40431	0
	TRINITY_DN48486_c0_g1_i1	AT5G41380.1	CCT motif family protein	-3.40431	0
	TRINITY_DN58626_c0_g1_i9	AT1G74950.1	JAZ2, TIFY10B | TIFY domain/Divergent CCT motif family protein	-3.38562	0
	TRINITY_DN58626_c0_g2_i1	AT1G19180.1	JAZ1, TIFY10A | jasmonate-zim-domain protein 1	-3.38263	0
	TRINITY_DN58626_c0_g2_i1	AT1G19180.1	JAZ1, TIFY10A | jasmonate-zim-domain protein 1	-3.38263	0
	TRINITY_DN52188_c1_g1_i1	AT1G75580.1	SAUR-like auxin-responsive protein family	-3.37732	0
	TRINITY_DN64664_c0_g1_i1	AT1G78570.1	RHM1, ROL1, ATRHM1 | rhamnose biosynthesis 1	-3.34764	0
	TRINITY_DN52160_c0_g1_i1	AT5G44210.1	ERF9, ATERF9, ATERF-9 | erf domain protein 9	-3.34683	0
	TRINITY_DN46469_c0_g1_i1	AT5G60920.1	COB|COBRA-likeextracellularglycosyl-phosphatidylinositol-anchoredproteinfamily	-3.3386	0
	TRINITY_DN2711_c0_g1_i1	AT5G27630.1	ACBP5|acyl-CoAbindingprotein5	-3.33425	0
	TRINITY_DN53586_c0_g1_i2	AT1G53903.1	Protein of unknown function (DUF581)	-3.30276	0
	TRINITY_DN53586_c0_g1_i2	AT1G53903.1	Protein of unknown function (DUF581)	-3.30276	0
	TRINITY_DN65236_c0_g1_i1	AT4G28650.1	Leucine-rich repeat transmembrane protein kinase family protein	-3.29264	0
	TRINITY_DN58133_c0_g1_i4	AT3G63120.1	CYCP1;1 | cyclin p1;1	-3.29025	0
	TRINITY_DN54773_c0_g2_i5	AT2G18390.1	TTN5, HAL, ARL2, ATARLC1 | ADP-ribosylation factor family protein	-3.2888	0
	TRINITY_DN57887_c0_g1_i1	AT5G61340.1	unknown protein	-3.27695	0
	TRINITY_DN64604_c0_g2_i10	AT1G70940.1	PIN3, ATPIN3 | Auxin efflux carrier family protein	-3.27232	0
	TRINITY_DN50603_c0_g1_i1	AT3G49220.1	Plant invertase/pectin methylesterase inhibitor superfamily	-3.26524	0
	TRINITY_DN51817_c0_g1_i1	AT5G44210.1	ERF9, ATERF9, ATERF-9 | erf domain protein 9	-3.24807	0
	TRINITY_DN51817_c0_g1_i1	AT5G44210.1	ERF9, ATERF9, ATERF-9 | erf domain protein 9	-3.24807	0
	TRINITY_DN57429_c0_g1_i1	AT3G60780.1	Protein of unknown function (DUF1442)	-3.24753	0
	TRINITY_DN57719_c0_g1_i3	AT5G63610.1	HEN3, CDKE;1, ATCDK8 | cyclin-dependent kinase E;1	-3.19927	0
	TRINITY_DN66445_c0_g1_i7	AT5G64570.1	XYL4, ATBXL4 | beta-D-xylosidase 4	-3.19533	0
	TRINITY_DN50218_c0_g1_i1	AT5G02010.1	ATROPGEF7, ROPGEF7 | RHO guanyl-nucleotide exchange factor 7	-3.18632	0
	TRINITY_DN53990_c0_g1_i2	AT5G02280.1	SNARE-like superfamily protein	-3.17978	0
	TRINITY_DN53990_c0_g1_i2	AT5G02280.1	SNARE-like superfamily protein	-3.17978	0
	TRINITY_DN57672_c0_g2_i1	AT5G13220.1	JAZ10, TIFY9, JAS1 | jasmonate-zim-domain protein 10	-3.17581	0
	TRINITY_DN59191_c0_g1_i3	AT1G60010.1	unknown protein	-3.16299	0
	TRINITY_DN51602_c0_g1_i1	AT1G20930.1	CDKB2;2 | cyclin-dependent kinase B2;2	-3.15213	0
	TRINITY_DN51602_c0_g1_i1	AT1G20930.1	CDKB2;2 | cyclin-dependent kinase B2;2	-3.15213	0
	TRINITY_DN54333_c0_g1_i1	AT1G69780.1	ATHB13 | Homeobox-leucine zipper protein family	-3.14848	0
	TRINITY_DN54333_c0_g1_i1	AT1G69780.1	ATHB13 | Homeobox-leucine zipper protein family	-3.14848	0
	TRINITY_DN44747_c0_g1_i1	AT1G07790.1	HTB1|Histonesuperfamilyprotein	-3.14199	0
	TRINITY_DN66571_c0_g1_i10	AT3G57170.1	N-acetylglucosaminyl transferase component family protein / Gpi1 family protein	-3.13672	0
	TRINITY_DN64557_c0_g1_i1	AT3G18660.2	PGSIP1, GUX1 | plant glycogenin-like starch initiation protein 1	-3.13402	0
	TRINITY_DN63765_c0_g1_i1	AT1G64390.1	AtGH9C2, GH9C2 | glycosyl hydrolase 9C2	-3.13283	0
	TRINITY_DN54203_c0_g1_i3	AT1G14300.1	ARM repeat superfamily protein	-3.12407	0
	TRINITY_DN63473_c0_g1_i1	AT1G68470.1	Exostosin family protein	-3.12195	0
	TRINITY_DN58550_c0_g1_i1	AT1G11545.1	XTH8 | xyloglucan endotransglucosylase/hydrolase 8	-3.09426	0
	TRINITY_DN58550_c0_g1_i1	AT1G11545.1	XTH8 | xyloglucan endotransglucosylase/hydrolase 8	-3.09426	0
	TRINITY_DN57903_c0_g1_i1	AT2G40550.1	ETG1 | E2F target gene 1	-3.08882	0
	TRINITY_DN58347_c0_g1_i1	AT3G14440.1	NCED3, ATNCED3, STO1, SIS7 | nine-cis-epoxycarotenoid dioxygenase 3	-3.08006	0
	TRINITY_DN58347_c0_g1_i1	AT3G14440.1	NCED3, ATNCED3, STO1, SIS7 | nine-cis-epoxycarotenoid dioxygenase 3	-3.08006	0
	TRINITY_DN65330_c0_g1_i5	AT4G08620.1	SULTR1;1 | sulphate transporter 1;1	-3.07966	0
	TRINITY_DN63268_c0_g1_i3	AT5G42180.1	Peroxidase superfamily protein	-3.0764	0
	TRINITY_DN43936_c0_g1_i1	AT2G34140.1	Dof-typezincfingerDNA-bindingfamilyprotein	-3.07635	0
	TRINITY_DN50761_c0_g1_i1	AT3G20060.1	ubiquitin-conjugating enzyme19	-3.07271	0
	TRINITY_DN57626_c0_g1_i1	AT2G45470.1	FLA8, AGP8 | FASCICLIN-like arabinogalactan protein 8	-3.05936	0
	TRINITY_DN48477_c0_g1_i1	AT1G26840.1	ORC6, ATORC6 | origin recognition complex protein 6	-3.05649	0
	TRINITY_DN58530_c0_g1_i1	AT4G12420.2	SKU5 | Cupredoxin superfamily protein	-3.05303	0
	TRINITY_DN58530_c0_g1_i1	AT4G12420.2	SKU5 | Cupredoxin superfamily protein	-3.05303	0
	TRINITY_DN66650_c0_g1_i1	AT1G74040.1	MAML-3, IPMS2 | 2-isopropylmalate synthase 1	-3.04679	0
	TRINITY_DN64652_c1_g2_i3	AT1G05470.1	CVP2 | DNAse I-like superfamily protein	-3.04279	0
	TRINITY_DN58113_c0_g1_i1	AT1G61260.1	Protein of unknown function (DUF761)	-3.03577	0
	TRINITY_DN46972_c0_g1_i1	AT5G66110.1	HIPP27|Heavymetaltransport/detoxificationsuperfamilyprotein	-3.03058	0
	TRINITY_DN57351_c0_g2_i1	AT1G20030.1	Pathogenesis-related thaumatin superfamily protein	-3.03033	0
	TRINITY_DN64347_c0_g1_i2	AT1G76160.1	sks5 | SKU5 similar 5	-3.02445	0
	TRINITY_DN46439_c0_g1_i1	AT1G05870.4	Proteinofunknownfunction(DUF1685)	-3.02069	0
	TRINITY_DN65255_c0_g1_i6	AT4G02400.1	U3 ribonucleoprotein (Utp) family protein	-3.01465	0
	TRINITY_DN55046_c0_g1_i1	AT1G02730.1	ATCSLD5, CSLD5, SOS6 | cellulose synthase-like D5	-3.01143	0
	TRINITY_DN44769_c0_g1_i1	AT5G03170.1	FLA11,ATFLA11|FASCICLIN-likearabinogalactan-protein11	-3.00869	0
	TRINITY_DN49976_c0_g1_i1	AT2G25060.1	ENODL14, AtENODL14 | early nodulin-like protein 14	-3.00653	0
	TRINITY_DN49976_c0_g1_i1	AT2G25060.1	ENODL14, AtENODL14 | early nodulin-like protein 14	-3.00653	0
	TRINITY_DN52651_c0_g1_i1	AT4G32110.1	Beta-1,3-N-Acetylglucosaminyltransferase family protein	-2.99807	0
	TRINITY_DN56970_c0_g1_i1	AT5G65360.1	Histone superfamily protein	-2.99123	0
	TRINITY_DN65338_c0_g1_i1	AT5G16690.1	ORC3, ATORC3 | origin recognition complex subunit 3	-2.96695	0
	TRINITY_DN26135_c0_g2_i1	AT3G59790.1	ATMPK10,MPK10|MAPkinase10	-2.96589	0
	TRINITY_DN53934_c0_g1_i3	AT4G39330.1	ATCAD9, CAD9 | cinnamyl alcohol dehydrogenase 9	-2.9617	0
	TRINITY_DN55149_c1_g1_i1	AT3G12670.1	emb2742 | CTP synthase family protein	-2.94815	0
	TRINITY_DN55163_c0_g1_i1	AT2G40610.1	ATEXPA8, EXP8, ATEXP8, ATHEXP ALPHA 1.11, EXPA8 | expansin A8	-2.93351	0
	TRINITY_DN58967_c0_g1_i1	AT4G17800.1	Predicted AT-hook DNA-binding family protein	-2.92228	0
	TRINITY_DN58967_c0_g1_i1	AT4G17800.1	Predicted AT-hook DNA-binding family protein	-2.92228	0
	TRINITY_DN65431_c0_g1_i3	AT2G26440.1	Plant invertase/pectin methylesterase inhibitor superfamily	-2.89405	0
	TRINITY_DN66650_c0_g1_i4	AT1G74040.1	IMS1, MAML-3, IPMS2 | 2-isopropylmalate synthase 1	-2.8903	0
	TRINITY_DN43872_c0_g1_i1	AT5G01190.1	LAC10|laccase10	-2.88404	0
	TRINITY_DN66445_c0_g1_i8	AT5G64570.1	XYL4, ATBXL4 | beta-D-xylosidase 4	-2.87845	0
	TRINITY_DN34282_c0_g1_i1	AT1G23965.1	unknownprotein	-2.87715	0
	TRINITY_DN58094_c0_g1_i1	AT2G10940.2	Bifunctional inhibitor/lipid-transfer protein/seed storage 2S albumin superfamily protein	-2.86782	0
	TRINITY_DN56705_c0_g1_i1	AT1G64980.1	Nucleotide-diphospho-sugar transferases superfamily protein	-2.8589	0
	TRINITY_DN48954_c0_g1_i1	AT5G58530.1	Glutaredoxin family protein	-2.85251	0
	TRINITY_DN65893_c0_g1_i1	AT1G31690.1	Copper amine oxidase family protein	-2.8488	0
	TRINITY_DN43028_c0_g1_i1	AT1G07900.1	LBD1|LOBdomain-containingprotein1	-2.84768	0
	TRINITY_DN45827_c0_g3_i1	AT4G32940.1	GAMMA-VPE,GAMMAVPE|gammavacuolarprocessingenzyme	-2.84315	0
	TRINITY_DN64720_c0_g2_i1	AT3G42660.1	transducin family protein / WD-40 repeat family protein	-2.83405	0
	TRINITY_DN55420_c0_g1_i1	AT4G17800.1	Predicted AT-hook DNA-binding family protein	-2.83148	0
	TRINITY_DN45827_c0_g4_i1	AT4G32940.1	GAMMA-VPE,GAMMAVPE|gammavacuolarprocessingenzyme	-2.81423	0
	TRINITY_DN55378_c0_g1_i1	AT2G25680.1	MOT1 | molybdate transporter 1	-2.80654	0
	TRINITY_DN56779_c0_g1_i1	AT1G44900.2	MCM2 | minichromosome maintenance (MCM2/3/5) family protein	-2.79615	0
	TRINITY_DN49960_c0_g1_i2	AT1G64640.1	ENODL8, AtENODL8 | early nodulin-like protein 8	-2.7801	0
	TRINITY_DN58487_c0_g1_i1	AT1G05260.1	RCI3, RCI3A | Peroxidase superfamily protein	-2.74546	0
	TRINITY_DN64998_c0_g1_i1	AT3G56870.1	unknown protein	-2.68175	0
	TRINITY_DN51488_c0_g1_i1	AT5G15350.1	ENODL17, AtENODL17 | early nodulin-like protein 17	-2.67094	0
	TRINITY_DN51488_c0_g1_i1	AT5G15350.1	ENODL17, AtENODL17 | early nodulin-like protein 17	-2.67094	0
	TRINITY_DN52090_c0_g1_i1	AT5G56550.1	OXS3, ATOXS3 | oxidative stress 3	-2.65542	0
	TRINITY_DN64387_c0_g1_i2	AT5G17420.1	IRX3, CESA7, ATCESA7, MUR10 | Cellulose synthase family protein	-2.65169	0
	TRINITY_DN65279_c0_g1_i6	AT1G48280.1	hydroxyproline-rich glycoprotein family protein	-2.64952	0
	TRINITY_DN64251_c0_g1_i3	AT4G20170.1	Domain of unknown function (DUF23)	-2.63804	0
	TRINITY_DN58487_c0_g1_i2	AT1G05260.1	RCI3, RCI3A | Peroxidase superfamily protein	-2.63501	0
	TRINITY_DN58487_c0_g1_i2	AT1G05260.1	RCI3, RCI3A | Peroxidase superfamily protein	-2.63501	0
	TRINITY_DN51782_c0_g1_i1	AT5G43080.1	CYCA3;1 | Cyclin A3;1	-2.6083	0
	TRINITY_DN51782_c0_g1_i1	AT5G43080.1	CYCA3;1 | Cyclin A3;1	-2.6083	0
	TRINITY_DN55656_c0_g1_i1	AT2G27370.1	Uncharacterised protein family (UPF0497)	-2.60332	0
	TRINITY_DN63422_c0_g1_i1	AT5G46580.1	pentatricopeptide (PPR) repeat-containing protein	-2.60285	0
	TRINITY_DN53455_c0_g1_i1	AT5G06860.1	PGIP1, ATPGIP1 | polygalacturonase inhibiting protein 1	-2.60148	0
	TRINITY_DN66122_c0_g1_i3	AT5G03760.1	ATCSLA09, CSLA09, ATCSLA9, CSLA9, RAT4 | Nucleotide-diphospho-sugar transferases superfamily protein	-2.5862	0
	TRINITY_DN58658_c0_g1_i1	AT2G45470.1	FLA8, AGP8 | FASCICLIN-like arabinogalactan protein 8	-2.57913	0
	TRINITY_DN58658_c0_g1_i1	AT2G45470.1	FLA8, AGP8 | FASCICLIN-like arabinogalactan protein 8	-2.57913	0
	TRINITY_DN48476_c0_g1_i2	AT1G15760.1	Sterile alpha motif (SAM) domain-containing protein	-2.54709	0
	TRINITY_DN65267_c0_g1_i1	AT4G32300.1	SD2-5 | S-domain-2 5	-2.54578	0
	TRINITY_DN49278_c0_g1_i1	AT1G59940.1	ARR3 | response regulator 3	-2.53841	0
	TRINITY_DN66445_c0_g1_i5	AT5G64570.1	XYL4, ATBXL4 | beta-D-xylosidase 4	-2.53527	0
	TRINITY_DN51971_c0_g1_i1	AT5G60390.3	GTP binding Elongation factor Tu family protein	-2.51033	0
	TRINITY_DN51971_c0_g1_i1	AT5G60390.3	GTP binding Elongation factor Tu family protein	-2.51033	0
	TRINITY_DN51777_c0_g1_i1	AT5G05920.1	DHS, EDA22 | deoxyhypusine synthase	-2.49273	0
	TRINITY_DN54545_c0_g1_i1	AT4G28500.1	ANAC073, SND2, NAC073 | NAC domain containing protein 73	-2.47971	0
	TRINITY_DN63342_c0_g1_i2	AT1G27210.1	ARM repeat superfamily protein	-2.46884	0
	TRINITY_DN58887_c0_g1_i3	AT2G30890.1	Cytochrome b561/ferric reductase transmembrane protein family	-2.46838	0
	TRINITY_DN58893_c0_g1_i1	AT4G11650.1	ATOSM34, OSM34 | osmotin 34	-2.45134	0
	TRINITY_DN63685_c0_g1_i4	AT3G13750.1	BGAL1 | beta galactosidase 1	-2.44409	0
	TRINITY_DN57182_c0_g1_i1	AT5G17860.1	CAX7 | calcium exchanger 7	-2.44149	0
	TRINITY_DN57182_c0_g1_i1	AT5G17860.1	CAX7 | calcium exchanger 7	-2.44149	0
	TRINITY_DN51442_c0_g1_i1	AT1G09750.1	Eukaryotic aspartyl protease family protein	-2.43962	0
	TRINITY_DN59176_c0_g1_i1	AT3G20820.1	Leucine-rich repeat (LRR) family protein	-2.43804	0
	TRINITY_DN37195_c0_g1_i1	AT5G59970.1	Histonesuperfamilyprotein	-2.43157	0
	TRINITY_DN66567_c0_g1_i8	AT3G25570.2	Adenosylmethionine decarboxylase family protein	-2.41205	0
	TRINITY_DN57851_c0_g1_i1	AT3G55990.1	ESK1, TBL29 | Plant protein of unknown function (DUF828)	-2.41092	0
	TRINITY_DN57851_c0_g1_i1	AT3G55990.1	ESK1, TBL29 | Plant protein of unknown function (DUF828)	-2.41092	0
	TRINITY_DN58970_c0_g1_i1	AT1G02850.2	BGLU11 | beta glucosidase 11	-2.40908	0
	TRINITY_DN58970_c0_g1_i1	AT1G02850.2	BGLU11 | beta glucosidase 11	-2.40908	0
	TRINITY_DN66007_c0_g1_i2	AT1G27920.1	MAP65-8 | microtubule-associated protein 65-8	-2.4052	0
	TRINITY_DN57266_c0_g1_i1	AT1G64660.1	ATMGL, MGL | methionine gamma-lyase	-2.4034	0
	TRINITY_DN64953_c0_g2_i1	AT1G69770.1	CMT3 | chromomethylase 3	-2.40176	0
	TRINITY_DN66496_c0_g1_i2	AT5G48930.1	HCT | hydroxycinnamoyl-CoA shikimate/quinate hydroxycinnamoyl transferase	-2.39483	0
	TRINITY_DN47961_c0_g1_i1	AT4G35320.1	unknownprotein	-2.38938	0
	TRINITY_DN47040_c0_g1_i2	AT2G36870.2	XTH32|xyloglucanendotransglucosylase/hydrolase32	-2.37389	0
	TRINITY_DN58268_c0_g1_i3	AT3G05910.1	Pectinacetylesterase family protein	-2.37177	0
	TRINITY_DN52285_c0_g1_i1	AT5G59970.1	Histone superfamily protein	-2.36563	0
	TRINITY_DN56993_c0_g1_i1	AT4G18780.1	CESA8, IRX1, ATCESA8, LEW2 | cellulose synthase family protein	-2.35864	0
	TRINITY_DN56993_c0_g1_i1	AT4G18780.1	CESA8, IRX1, ATCESA8, LEW2 | cellulose synthase family protein	-2.35864	0
	TRINITY_DN54720_c0_g1_i1	AT1G76160.1	sks5 | SKU5 similar 5	-2.35137	0
	TRINITY_DN65279_c0_g1_i6	AT1G48280.1	hydroxyproline-rich glycoprotein family protein	-2.34908	0
	TRINITY_DN57169_c0_g1_i2	AT1G08500.1	ENODL18, AtENODL18 | early nodulin-like protein 18	-2.34405	0
	TRINITY_DN52907_c0_g1_i1	AT2G42320.2	nucleolar protein gar2-related	-2.33996	0
	TRINITY_DN52907_c0_g1_i1	AT2G42320.2	nucleolar protein gar2-related	-2.33996	0
	TRINITY_DN56911_c0_g1_i1	AT3G01680.1	CONTAINS InterPro DOMAIN/s: Mediator complex subunit Med28	-2.32123	0
	TRINITY_DN58616_c0_g1_i1	AT5G15720.1	GLIP7 | GDSL-motif lipase 7	-2.3168	0
	TRINITY_DN58616_c0_g1_i1	AT5G15720.1	GLIP7 | GDSL-motif lipase 7	-2.3168	0
	TRINITY_DN54894_c0_g1_i3	AT5G66390.1	Peroxidase superfamily protein	-2.30246	0
	TRINITY_DN57232_c0_g1_i1	AT5G05340.1	Peroxidase superfamily protein	-2.2966	0
	TRINITY_DN53898_c0_g1_i1	AT2G04780.2	FLA7 | FASCICLIN-like arabinoogalactan 7	-2.2928	0
	TRINITY_DN51982_c0_g1_i1	AT3G54820.1	PIP2D, PIP2;5 | plasma membrane intrinsic protein 2;5	-2.28122	0
	TRINITY_DN58066_c0_g1_i1	AT1G12780.1	UGE1, ATUGE1 | UDP-D-glucose/UDP-D-galactose 4-epimerase 1	-2.25105	0
	TRINITY_DN65366_c0_g1_i4	AT4G21270.1	ATK1, KATA, KATAP | kinesin 1	-2.24501	0
	TRINITY_DN49131_c0_g2_i1	AT2G36870.1	XTH32 | xyloglucan endotransglucosylase/hydrolase 32	-2.24153	0
	TRINITY_DN49131_c0_g2_i1	AT2G36870.1	XTH32 | xyloglucan endotransglucosylase/hydrolase 32	-2.24153	0
	TRINITY_DN58262_c0_g1_i1	AT2G07690.1	MCM5 | Minichromosome maintenance (MCM2/3/5) family protein	-2.22722	0
	TRINITY_DN56632_c0_g1_i1	AT5G01990.1	Auxin efflux carrier family protein	-2.22469	0
	TRINITY_DN64105_c0_g1_i5	AT5G15490.1	UDP-glucose 6-dehydrogenase family protein	-2.19521	0
	TRINITY_DN63906_c0_g1_i2	AT5G47800.1	Phototropic-responsive NPH3 family protein	-2.17727	0
	TRINITY_DN64764_c0_g1_i1	AT5G23960.2	TPS21 | terpene synthase 21	-2.17489	0
	TRINITY_DN66568_c0_g1_i2	AT5G42710.2	unknown protein; INVOLVED IN: biological_process unknown.	-2.14176	0
	TRINITY_DN105058_c0_g1_i1	AT2G29940.1	PDR3,ATPDR3|pleiotropicdrugresistance3	0	-8.74791
	TRINITY_DN19411_c0_g1_i1	AT4G15000.1	RibosomalL27eproteinfamily	0	6.79463
	TRINITY_DN26635_c0_g1_i1	AT1G64780.1	ATAMT1;2,AMT1;2|ammoniumtransporter1;2	0	-7.6449
	TRINITY_DN30000_c0_g2_i1	AT4G17030.1	ATEXLB1,EXPR,AT-EXPR,ATEXPR1,ATHEXPBETA3.1,EXLB1|expansin-likeB1	0	-8.3866
	TRINITY_DN3822_c0_g1_i1	AT3G49930.1	C2H2andC2HCzincfingerssuperfamilyprotein	0	-4.74501
	TRINITY_DN39415_c0_g1_i2	AT5G38280.1	PR5K|PR5-likereceptorkinase	0	-4.04487
	TRINITY_DN40911_c0_g1_i1	AT3G13540.1	ATMYB5,MYB5|mybdomainprotein5	0	-7.90059
	TRINITY_DN40911_c0_g1_i2	AT5G49330.1	MYB111,ATMYB111,PFG3|mybdomainprotein111	0	-3.71874
	TRINITY_DN41384_c0_g1_i1	AT3G02740.1	Eukaryoticaspartylproteasefamilyprotein	0	-8.85774
	TRINITY_DN42182_c0_g2_i1	AT2G29420.1	ATGSTU7, GST25, GSTU7 | glutathione S-transferase tau 7	0	-3.1884
	TRINITY_DN42182_c0_g2_i1	AT2G29420.1	ATGSTU7, GST25, GSTU7	0	-3.1884
	TRINITY_DN42431_c0_g1_i2	AT4G15630.1	Uncharacterisedproteinfamily(UPF0497)	0	-8.21729
	TRINITY_DN44298_c0_g1_i1	AT5G49620.2	MYB78 | myb domain protein 78	0	-5.11445
	TRINITY_DN45203_c0_g1_i1	AT5G19630.1	alpha/beta-Hydrolasessuperfamilyprotein	0	-7.40155
	TRINITY_DN45953_c0_g1_i4	AT1G27620.1	HXXXD-typeacyl-transferasefamilyprotein	0	-7.87206
	TRINITY_DN46496_c0_g1_i1	AT3G47070.1	LOCATEDIN:thylakoid,chloroplastthylakoidmembrane,chloroplast,chloroplastenvelope	0	-4.10809
	TRINITY_DN46734_c0_g1_i4	AT1G01490.2	Heavymetaltransport/detoxificationsuperfamilyprotein	0	-7.48594
	TRINITY_DN46837_c0_g1_i1	AT5G05340.1	Peroxidase superfamily protein	0	-3.17199
	TRINITY_DN48034_c0_g1_i1	AT1G61930.1	Protein of unknown function, DUF584	0	-3.11996
	TRINITY_DN48106_c0_g1_i4	AT4G13730.1	Ypt/Rab-GAP domain of gyp1p superfamily protein	0	6.56607
	TRINITY_DN48143_c1_g1_i3	AT1G01490.2	Heavy metal transport/detoxification superfamily protein	0	-4.23159
	TRINITY_DN48143_c1_g1_i4	AT1G01490.2	Heavy metal transport/detoxification superfamily protein	0	-3.34985
	TRINITY_DN48321_c0_g1_i1	AT4G33680.1	AGD2 | Pyridoxal phosphate (PLP)-dependent transferases superfamily protein	0	-8.70915
	TRINITY_DN48564_c0_g1_i1	AT2G46080.1	CONTAINS InterPro DOMAIN/s: Protein BYPASS related	0	-3.40386
	TRINITY_DN48564_c0_g1_i1	AT2G46080.1	CONTAINS InterPro DOMAIN/s: Protein BYPASS related (InterPro:IPR008511)	0	-3.40386
	TRINITY_DN48795_c0_g1_i1	AT1G19310.1	RING/U-box superfamily protein	0	7.85601
	TRINITY_DN49193_c0_g2_i1	AT3G01980.4	NAD(P)-binding Rossmann-fold superfamily protein	0	-4.72966
	TRINITY_DN49193_c0_g2_i1	AT3G01980.4	NAD(P)-binding Rossmann-fold superfamily protein	0	-4.72966
	TRINITY_DN49231_c0_g2_i1	AT1G71695.1	Peroxidase superfamily protein	0	-3.25877
	TRINITY_DN49505_c0_g1_i3	AT5G26170.1	WRKY50, ATWRKY50 | WRKY DNA-binding protein 50	0	-5.08982
	TRINITY_DN49737_c0_g1_i2	AT5G56260.1	Ribonuclease E inhibitor RraA/Dimethylmenaquinone methyltransferase	0	-9.00075
	TRINITY_DN49737_c0_g1_i2	AT5G56260.1	Ribonuclease E inhibitor RraA/Dimethylmenaquinone methyltransferase	0	-9.00075
	TRINITY_DN49801_c0_g1_i2	AT3G02430.1	Protein of unknown function (DUF679)	0	-5.56136
	TRINITY_DN49801_c0_g1_i2	AT3G02430.1	Protein of unknown function (DUF679)	0	-5.56136
	TRINITY_DN50808_c0_g1_i1	AT1G80840.1	WRKY40, ATWRKY40 | WRKY DNA-binding protein 40	0	-3.46116
	TRINITY_DN50828_c0_g1_i2	AT1G76690.1	OPR2, ATOPR2 | 12-oxophytodienoate reductase 2	0	-4.24733
	TRINITY_DN50828_c0_g1_i2	AT1G76690.1	OPR2, ATOPR2 | 12-oxophytodienoate reductase 2	0	-4.24733
	TRINITY_DN51015_c0_g1_i3	AT4G09600.1	GASA3 | GAST1 protein homolog 3	0	-3.1159
	TRINITY_DN51735_c0_g1_i5	AT1G14880.1	PCR1 | PLANT CADMIUM RESISTANCE 1	0	-4.24081
	TRINITY_DN51750_c0_g1_i1	AT1G55790.1	Domain of unknown function (DUF2431)	0	-4.88416
	TRINITY_DN52389_c0_g1_i3	AT5G03500.3	Mediator complex, subunit Med7	0	7.67646
	TRINITY_DN52471_c0_g1_i1	AT3G13870.2	RHD3 | Root hair defective 3 GTP-binding protein (RHD3)	0	6.89193
	TRINITY_DN53147_c0_g1_i1	AT3G54420.1	ATEP3, ATCHITIV, CHIV, EP3 | homolog of carrot EP3-3 chitinase	0	-4.79046
	TRINITY_DN53176_c0_g1_i1	AT5G16080.1	AtCXE17, CXE17 | carboxyesterase 17	0	-6.41088
	TRINITY_DN53176_c0_g1_i1	AT5G16080.1	AtCXE17, CXE17 | carboxyesterase 17	0	-6.41088
	TRINITY_DN53274_c0_g1_i1	AT2G31390.1	pfkB-like carbohydrate kinase family protein	0	-9.01419
	TRINITY_DN53274_c0_g1_i1	AT2G31390.1	pfkB-like carbohydrate kinase family protein	0	-9.01419
	TRINITY_DN53383_c0_g1_i1	AT2G46080.1	CONTAINS InterPro DOMAIN/s: Protein BYPASS related	0	-5.53644
	TRINITY_DN53383_c0_g1_i1	AT2G46080.1	CONTAINS InterPro DOMAIN/s: Protein BYPASS related (InterPro:IPR008511)	0	-5.53644
	TRINITY_DN53703_c0_g1_i4	AT3G06880.2	Transducin/WD40 repeat-like superfamily protein	0	6.74613
	TRINITY_DN53729_c0_g1_i2	AT1G80840.1	WRKY40, ATWRKY40 | WRKY DNA-binding protein 40	0	-4.24319
	TRINITY_DN53729_c0_g1_i4	AT1G80840.1	WRKY40, ATWRKY40 | WRKY DNA-binding protein 40	0	-7.05177
	TRINITY_DN54000_c0_g1_i1	AT5G62020.1	AT-HSFB2A, HSFB2A | heat shock transcription factor B2A	0	-9.24027
	TRINITY_DN54000_c0_g1_i1	AT5G62020.1	AT-HSFB2A, HSFB2A | heat shock transcription factor B2A	0	-9.24027
	TRINITY_DN54000_c0_g1_i2	AT3G24520.1	AT-HSFC1, HSFC1 | heat shock transcription factor C1	0	-7.03616
	TRINITY_DN54193_c0_g1_i1	AT1G68540.1	NAD(P)-binding Rossmann-fold superfamily protein	0	-3.17292
	TRINITY_DN54193_c0_g1_i1	AT1G68540.1	NAD(P)-binding Rossmann-fold superfamily protein	0	-3.17292
	TRINITY_DN54193_c0_g1_i3	AT1G68540.1	NAD(P)-binding Rossmann-fold superfamily protein	0	-4.175
	TRINITY_DN54193_c0_g1_i3	AT1G68540.1	NAD(P)-binding Rossmann-fold superfamily protein	0	-4.175
	TRINITY_DN54601_c0_g1_i4	AT1G69560.1	MYB105, LOF2, ATMYB105 | myb domain protein 105	0	6.76565
	TRINITY_DN54601_c0_g1_i4	AT1G69560.1	MYB105, LOF2, ATMYB105 | myb domain protein 105	0	6.76565
	TRINITY_DN54683_c0_g1_i1	AT5G66430.1	S-adenosyl-L-methionine-dependent methyltransferases superfamily protein	0	-8.60537
	TRINITY_DN54687_c0_g1_i8	AT1G08230.2	Transmembrane amino acid transporter family protein	0	-7.0368
	TRINITY_DN54687_c0_g1_i8	AT1G08230.2	Transmembrane amino acid transporter family protein	0	-7.0368
	TRINITY_DN54699_c0_g1_i4	AT5G26667.3	PYR6 | P-loop containing nucleoside triphosphate hydrolases superfamily protein	0	-7.9783
	TRINITY_DN54908_c0_g1_i3	AT2G37195.1	unknown protein	0	6.73396
	TRINITY_DN54911_c0_g1_i2	AT3G48360.1	BT2, ATBT2 | BTB and TAZ domain protein 2	0	-3.25802
	TRINITY_DN55126_c0_g1_i2	AT5G04930.1	ALA1 | aminophospholipid ATPase 1	0	-6.06859
	TRINITY_DN55126_c0_g1_i2	AT5G04930.1	ALA1 | aminophospholipid ATPase 1	0	-6.06859
	TRINITY_DN55353_c0_g1_i	AT1G68260.1	Thioesterase superfamily protein	0	6.87513
	TRINITY_DN55353_c0_g1_i	AT1G68260.1	Thioesterase superfamily protein	0	6.87513
	TRINITY_DN55417_c0_g1_i1	AT2G17120.1	LYM2 | lysm domain GPI-anchored protein 2 precursor	0	-3.31396
	TRINITY_DN55626_c0_g1_i1	AT3G56400.1	WRKY70, ATWRKY70 | WRKY DNA-binding protein 70	0	-6.80695
	TRINITY_DN55626_c0_g1_i2	AT2G46400.1	WRKY46, ATWRKY46 | WRKY DNA-binding protein 46	0	-8.56787
	TRINITY_DN55626_c0_g1_i2	AT2G46400.1	WRKY46, ATWRKY46 | WRKY DNA-binding protein 46	0	-8.56787
	TRINITY_DN55626_c0_g1_i3	AT3G56400.1	WRKY70, ATWRKY70 | WRKY DNA-binding protein 70	0	-5.98775
	TRINITY_DN55626_c0_g1_i3	AT3G56400.1	WRKY70, ATWRKY70 | WRKY DNA-binding protein 70	0	-5.98775
	TRINITY_DN55626_c0_g1_i4	AT2G46400.1	WRKY46, ATWRKY46 | WRKY DNA-binding protein 46	0	-8.38865
	TRINITY_DN55981_c0_g1_i3	AT1G68540.1	NAD(P)-binding Rossmann-fold superfamily protein	0	-4.1718
	TRINITY_DN55981_c0_g1_i3	AT1G68540.1	NAD(P)-binding Rossmann-fold superfamily protein	0	-4.1718
	TRINITY_DN56473_c0_g1_i7	AT1G72650.2	TRFL6 | TRF-like 6	0	8.24489
	TRINITY_DN56624_c0_g1_i5	AT1G33490.1	unknown protein	0	-8.15002
	TRINITY_DN56685_c0_g1_i3	AT5G50400.1	ATPAP27, PAP27 | purple acid phosphatase 27	0	-3.54147
	TRINITY_DN56934_c0_g1_i4	AT3G50660.1	DWF4, CYP90B1, CLM, SNP2, SAV1, PSC1 | Cytochrome P450 superfamily protein	0	4.26837
	TRINITY_DN56964_c0_g1_i10	AT1G80840.1	WRKY40, ATWRKY40 | WRKY DNA-binding protein 40 "	0	-9.99819
	TRINITY_DN56964_c0_g1_i10	AT1G80840.1	WRKY40, ATWRKY40 | WRKY DNA-binding protein 40	0	-9.99819
	TRINITY_DN56964_c0_g1_i13	AT1G80840.1	WRKY40, ATWRKY40 | WRKY DNA-binding protein 40	0	-7.82036
	TRINITY_DN56964_c0_g1_i15	AT1G80840.1	WRKY40, ATWRKY40 | WRKY DNA-binding protein 40	0	-8.40785
	TRINITY_DN56964_c0_g1_i15	AT1G80840.1	WRKY40, ATWRKY40 | WRKY DNA-binding protein 40	0	-8.40785
	TRINITY_DN56964_c0_g1_i3	AT1G80840.1	WRKY40, ATWRKY40 | WRKY DNA-binding protein 40	0	-6.89788
	TRINITY_DN56964_c0_g1_i4	AT1G80840.1	WRKY40, ATWRKY40 | WRKY DNA-binding protein 40	0	-7.83593
	TRINITY_DN56964_c0_g1_i7	AT1G80840.1	WRKY40, ATWRKY40 | WRKY DNA-binding protein 40	0	-5.17751
	TRINITY_DN56964_c0_g1_i8	AT1G80840.1	WRKY40, ATWRKY40 | WRKY DNA-binding protein 40	0	-10.2748
	TRINITY_DN57021_c0_g1_i1	AT5G14040.1	PHT3;1 | phosphate transporter 3;1	0	-3.5516
	TRINITY_DN57021_c0_g1_i1	AT5G14040.1	PHT3;1 | phosphate transporter 3;1	0	-3.5516
	TRINITY_DN57080_c0_g1_i1	AT2G27110.3	FRS3 | FAR1-related sequence 3	0	-8.31231
	TRINITY_DN57080_c0_g1_i1	AT2G27110.3	FRS3 | FAR1-related sequence 3	0	-8.31231
	TRINITY_DN57384_c0_g1_i2	AT3G56400.1	WRKY70, ATWRKY70 | WRKY DNA-binding protein 70	0	-3.44568
	TRINITY_DN57384_c0_g1_i2	AT3G56400.1	WRKY70, ATWRKY70 | WRKY DNA-binding protein 70	0	-3.44568
	TRINITY_DN57467_c0_g1_i1	AT5G37490.1	ARM repeat superfamily protein	0	-4.31668
	TRINITY_DN57517_c0_g1_i1	AT3G57240.1	BG3 | beta-1,3-glucanase 3	0	-6.69814
	TRINITY_DN57517_c0_g1_i1	AT3G57240.1	BG3 | beta-1,3-glucanase 3	0	-6.69814
	TRINITY_DN57743_c0_g1_i1	AT4G21060.2	Galactosyltransferase family protein	0	-6.99526
	TRINITY_DN57855_c0_g1_i1	AT3G26430.1	GDSL-like Lipase/Acylhydrolase superfamily protein	0	-5.29831
	TRINITY_DN57874_c0_g1_i1	AT4G20050.2	QRT3 | Pectin lyase-like superfamily protein	0	-3.86888
	TRINITY_DN57915_c0_g1_i2	AT2G01430.1	ATHB17, ATHB-17, HB17 | homeobox-leucine zipper protein 17	0	-3.71085
	TRINITY_DN57915_c0_g1_i2	AT2G01430.1	ATHB17, ATHB-17, HB17 | homeobox-leucine zipper protein 17	0	-3.71085
	TRINITY_DN58049_c0_g1_i5	AT3G21510.1	AHP1 | histidine-containing phosphotransmitter 1	0	8.54749
	TRINITY_DN58147_c0_g1_i4	AT4G31150.1	endonuclease V family protein	0	6.93608
	TRINITY_DN58351_c0_g1_i4	AT5G64810.1	WRKY51, ATWRKY51 | WRKY DNA-binding protein 51	0	-4.05104
	TRINITY_DN58407_c0_g1_i1	AT1G31650.1	ATROPGEF14, ROPGEF14 | RHO guanyl-nucleotide exchange factor 14	0	8.88127
	TRINITY_DN58407_c0_g1_i1	AT1G31650.1	ATROPGEF14, ROPGEF14 | RHO guanyl-nucleotide exchange factor 14	0	8.88127
	TRINITY_DN58457_c0_g1_i5	AT1G07430.1	HAI2 | highly ABA-induced PP2C gene 2	0	9.38111
	TRINITY_DN58457_c0_g1_i5	AT1G07430.1	HAI2 | highly ABA-induced PP2C gene 2	0	9.38111
	TRINITY_DN58461_c0_g2_i4	AT3G63140.1	CSP41A | chloroplast stem-loop binding protein of 41 kDa	0	-7.29698
	TRINITY_DN58576_c0_g1_i1	AT5G59740.1	UDP-N-acetylglucosamine (UAA) transporter family	0	-7.90455
	TRINITY_DN58586_c0_g1_i2	AT3G04070.2	anac047, NAC047 | NAC domain containing protein 47	0	-3.38817
	TRINITY_DN58586_c0_g1_i2	AT3G04070.2	anac047, NAC047 | NAC domain containing protein 47	0	-3.38817
	TRINITY_DN58630_c0_g1_i17	AT3G18670.1	Ankyrin repeat family protein	0	-8.11133
	TRINITY_DN58630_c0_g1_i17	AT3G18670.1	Ankyrin repeat family protein	0	-8.11133
	TRINITY_DN58782_c0_g1_i1	AT5G66430.1	S-adenosyl-L-methionine-dependent methyltransferases superfamily protein	0	-5.60214
	TRINITY_DN58782_c0_g1_i2	AT5G66430.1	S-adenosyl-L-methionine-dependent methyltransferases superfamily protein	0	-3.93751
	TRINITY_DN58782_c0_g1_i2	AT5G66430.1	S-adenosyl-L-methionine-dependent methyltransferases superfamily protein	0	-3.93751
	TRINITY_DN58782_c0_g1_i3	AT4G36470.1	S-adenosyl-L-methionine-dependent methyltransferases superfamily protein	0	-3.61788
	TRINITY_DN58871_c0_g1_i1	AT4G01070.1	GT72B1, UGT72B1 | UDP-Glycosyltransferase superfamily protein	0	-4.32565
	TRINITY_DN58880_c0_g1_i1	AT5G17540.1	HXXXD-type acyl-transferase family protein	0	-7.01427
	TRINITY_DN58880_c0_g1_i1	AT5G17540.1	HXXXD-type acyl-transferase family protein	0	-7.01427
	TRINITY_DN58980_c0_g1_i1	AT2G37040.1	PAL1, ATPAL1 | PHE ammonia lyase 1	0	-3.58844
	TRINITY_DN58980_c0_g1_i2	AT2G37040.1	PAL1, ATPAL1 | PHE ammonia lyase 1	0	-3.47378
	TRINITY_DN58980_c0_g1_i2	AT2G37040.1	PAL1, ATPAL1 | PHE ammonia lyase 1	0	-3.47378
	TRINITY_DN59179_c0_g1_i1	AT1G66540.2	Cytochrome P450 superfamily protein	0	-3.25268
	TRINITY_DN59179_c0_g1_i1	AT1G66540.2	Cytochrome P450 superfamily protein	0	-3.25268
	TRINITY_DN59211_c0_g1_i3	AT1G56500.1	haloacid dehalogenase-like hydrolase family protein	0	-8.89481
	TRINITY_DN59234_c0_g1_i2	AT4G23940.1	FtsH extracellular protease family	0	9.7989
	TRINITY_DN59234_c0_g1_i2	AT4G23940.1	FtsH extracellular protease family	0	9.7989
	TRINITY_DN63102_c0_g1_i3	AT5G05570.2	transducin family protein / WD-40 repeat family protein	0	-8.33111
	TRINITY_DN63249_c0_g1_i2	AT1G35510.1	O-fucosyltransferase family protein	0	-7.34335
	TRINITY_DN63311_c0_g1_i3	AT1G60060.1	Serine/threonine-protein kinase WNK (With No Lysine)-related	0	-7.91668
	TRINITY_DN63366_c0_g2_i1	AT5G56260.1	Ribonuclease E inhibitor RraA/Dimethylmenaquinone methyltransferase	0	-3.60605
	TRINITY_DN63515_c0_g1_i2	AT3G29230.1	Tetratricopeptide repeat (TPR)-like superfamily protein	0	7.49409
	TRINITY_DN63629_c0_g1_i1	AT5G58320.2	Kinase interacting (KIP1-like) family protein	0	6.52864
	TRINITY_DN63629_c0_g1_i4	AT5G58320.2	Kinase interacting (KIP1-like) family protein	0	7.08291
	TRINITY_DN63645_c0_g1_i3	AT3G08650.1	ZIP metal ion transporter family	0	-8.35841
	TRINITY_DN63726_c0_g1_i1	AT2G41900.1	CCCH-type zinc finger protein with ARM repeat domain	0	7.2838
	TRINITY_DN63730_c0_g1_i1	AT5G16340.1	AMP-dependent synthetase and ligase family protein	0	-6.25401
	TRINITY_DN63730_c0_g1_i2	AT5G16340.1	AMP-dependent synthetase and ligase family protein	0	-7.21647
	TRINITY_DN63885_c0_g1_i2	AT5G50260.1	Cysteine proteinases superfamily protein	0	-3.54234
	TRINITY_DN63924_c0_g1_i1	AT1G15520.1	PDR12, ATPDR12, ABCG40, ATABCG40 | pleiotropic drug resistance 12	0	-3.8491
	TRINITY_DN63940_c0_g1_i2	AT1G48100.1	Pectin lyase-like superfamily protein	0	6.3984
	TRINITY_DN63990_c0_g1_i2	AT1G67850.2	Protein of unknown function (DUF707)	0	-7.51463
	TRINITY_DN64027_c0_g1_i3	AT3G17740.1	unknown protein	0	-7.43849
	TRINITY_DN64037_c0_g1_i8	AT1G04910.1	O-fucosyltransferase family protein	0	7.23765
	TRINITY_DN64179_c0_g1_i1	AT3G22830.1	AT-HSFA6B, HSFA6B | heat shock transcription factor A6B	0	4.22501
	TRINITY_DN64191_c0_g2_i3	AT1G24764.1	ATMAP70-2, MAP70-2 | microtubule-associated proteins 70-2	0	-8.002
	TRINITY_DN64247_c0_g1_i1	AT5G64300.1	ATGCH, GCH, ATRIBA1, RFD1 | GTP cyclohydrolase II	0	-3.02204
	TRINITY_DN64550_c0_g1_i5	AT2G19430.1	DWA1, THO6, AtTHO6 | DWD (DDB1-binding WD40 protein) hypersensitive to ABA 1	0	-7.6877
	TRINITY_DN64570_c0_g1_i1	AT5G40780.2	lysine histidine transporter 1	0	-2.92344
	TRINITY_DN64609_c0_g1_i2	AT2G31955.2	CNX2 | cofactor of nitrate reductase and xanthine dehydrogenase 2	0	-8.44306
	TRINITY_DN64618_c0_g1_i3	AT4G01700.1	Chitinase family protein	0	-3.04817
	TRINITY_DN64645_c0_g1_i1	AT2G38410.1	ENTH/VHS/GAT family protein	0	-3.67898
	TRINITY_DN64724_c0_g1_i10	AT4G35600.2	CONNEXIN 32 | Protein kinase superfamily protein	0	-8.09121
	TRINITY_DN64795_c0_g1_i3	AT1G31410.1	putrescine-binding periplasmic protein-related	0	7.4079
	TRINITY_DN64810_c0_g1_i1	AT2G38110.1	ATGPAT6, GPAT6 | glycerol-3-phosphate acyltransferase 6	0	-8.93664
	TRINITY_DN64886_c0_g1_i1	AT2G21790.1	R1, RNR1, CLS8, ATRNR1 | ribonucleotide reductase 1	0	-4.43914
	TRINITY_DN65011_c1_g1_i2	AT2G30780.1	Tetratricopeptide repeat (TPR)-like superfamily protein	0	-9.00633
	TRINITY_DN65047_c0_g1_i2	AT5G55060.1	unknown protein	0	-3.10216
	TRINITY_DN65096_c0_g1_i14	AT3G18380.2	sequence-specific DNA binding transcription factors;sequence-specific DNA binding	0	-7.21551
	TRINITY_DN65176_c0_g1_i3	AT3G01540.4	DRH1, ATDRH1 | DEAD box RNA helicase 1	0	-9.95358
	TRINITY_DN65281_c0_g1_i1	AT1G73280.1	scpl3 | serine carboxypeptidase-like 3	0	-3.75957
	TRINITY_DN65306_c0_g1_i3	AT2G45880.1	BMY4, BAM7 | beta-amylase 7	0	8.6403
	TRINITY_DN65353_c0_g2_i2	AT4G30980.1	LRL2 | LJRHL1-like 2	0	8.17422
	TRINITY_DN65353_c0_g2_i3	AT4G30980.1	LRL2 | LJRHL1-like 2	0	-5.87692
	TRINITY_DN65358_c0_g1_i1	AT3G15920.1	Phox (PX) domain-containing protein	0	-7.96265
	TRINITY_DN65373_c0_g1_i6	AT1G21730.1	P-loop containing nucleoside triphosphate hydrolases superfamily protein	0	-7.5604
	TRINITY_DN65373_c0_g1_i7	AT1G21730.1	P-loop containing nucleoside triphosphate hydrolases superfamily protein	0	-5.99978
	TRINITY_DN65394_c0_g1_i4	AT1G73805.1	Calmodulin binding protein-like	0	-3.20785
	TRINITY_DN65394_c0_g1_i5	AT1G73805.1	Calmodulin binding protein-like	0	-7.96143
	TRINITY_DN65461_c0_g1_i5	AT4G35030.3	Protein kinase superfamily protein	0	-9.87676
	TRINITY_DN65465_c0_g1_i5	AT5G58040.1	ATFIP1[V], FIPS5, ATFIPS5, FIP1[V] | homolog of yeast FIP1 [V] |	0	-8.14426
	TRINITY_DN65546_c0_g1_i1	AT3G53480.1	PIS1, PDR9, ATPDR9, ABCG37 | pleiotropic drug resistance 9	0	-3.03285
	TRINITY_DN65550_c0_g1_i2	AT1G66120.1	AMP-dependent synthetase and ligase family protein	0	-7.59728
	TRINITY_DN65617_c0_g1_i1	AT2G13440.1	glucose-inhibited division family A protein	0	-7.35746
	TRINITY_DN65617_c0_g1_i3	AT2G13440.1	glucose-inhibited division family A protein	0	7.47313
	TRINITY_DN65617_c0_g1_i6	AT2G13440.1	glucose-inhibited division family A protein	0	-8.66208
	TRINITY_DN65686_c0_g1_i2	AT1G61680.1	TPS14, ATTPS14 | terpene synthase 14	0	-3.53507
	TRINITY_DN65779_c0_g1_i7	AT4G21300.1	Tetratricopeptide repeat (TPR)-like superfamily protein	0	-8.63292
	TRINITY_DN65829_c0_g1_i8	AT4G11530.1	CRK34 | cysteine-rich RLK (RECEPTOR-like protein kinase) 34	0	-4.32844
	TRINITY_DN65874_c0_g1_i3	AT5G09360.1	LAC14 | laccase 14	0	-3.15012
	TRINITY_DN65890_c0_g1_i7	AT3G45830.1	unknown protein	0	-8.16047
	TRINITY_DN65890_c0_g1_i9	AT3G45830.1	unknown protein	0	8.66589
	TRINITY_DN65952_c1_g1_i1	AT4G14465.1	AHL20 | AT-hook motif nuclear-localized protein 20	0	-3.73776
	TRINITY_DN65967_c0_g1_i3	AT2G20050.1	protein serine/threonine phosphatases;protein kinases;catalytics;cAMP-dependent protein kinase regulators;ATP binding;protein serine/threonine phosphatases	0	-8.25534
	TRINITY_DN66001_c1_g1_i4	AT2G36800.1	DOGT1, UGT73C5 | don-glucosyltransferase 1	0	-5.98527
	TRINITY_DN66016_c0_g1_i3	AT5G65450.1	UBP17 | ubiquitin-specific protease 17	0	-5.67063
	TRINITY_DN66141_c0_g1_i2	AT3G33530.1	Transducin family protein / WD-40 repeat family protein	0	-8.26797
	TRINITY_DN66144_c0_g1_i3	AT4G24560.1	UBP16 | ubiquitin-specific protease 16	0	-8.654
	TRINITY_DN66168_c0_g1_i9	AT4G01800.1	AGY1, AtcpSecA, SECA1 | Albino or Glassy Yellow 1	0	-7.89885
	TRINITY_DN66242_c0_g1_i2	AT5G45720.2	AAA-type ATPase family protein	0	7.54184
	TRINITY_DN66267_c2_g2_i2	AT2G37040.1	PAL1, ATPAL1 | PHE ammonia lyase 1	0	-4.20698
	TRINITY_DN66295_c0_g1_i7	AT2G18760.1	CHR8 | chromatin remodeling 8	0	-7.03387
	TRINITY_DN66333_c0_g1_i7	AT1G79740.1	hAT transposon superfamily	0	-7.32505
	TRINITY_DN66417_c0_g1_i1	AT1G04390.1	BTB/POZ domain-containing protein	0	-7.30241
	TRINITY_DN66421_c0_g4_i1	AT3G17450.1	hAT dimerisation domain-containing protein	0	-6.97923
	TRINITY_DN66456_c0_g1_i1	AT2G34780.1	EMB1611, MEE22 | maternal effect embryo arrest 22	0	-8.42135
	TRINITY_DN66491_c0_g1_i7	AT1G11330.1	S-locus lectin protein kinase family protein	0	-8.94016
	TRINITY_DN66524_c0_g1_i5	AT4G35780.1	ACT-like protein tyrosine kinase family protein	0	-8.10642
	TRINITY_DN66527_c0_g1_i6	AT4G00300.2	fringe-related protein	0	-10.1675
	TRINITY_DN66645_c1_g1_i4	AT5G13930.1	CHS, TT4, ATCHS | Chalcone and stilbene synthase family protein	0	-4.37124
	TRINITY_DN66645_c1_g1_i6	AT5G13930.1	CHS, TT4, ATCHS | Chalcone and stilbene synthase family protein	0	-4.64432
	TRINITY_DN66777_c0_g6_i4	AT3G03800.1	SYP131, ATSYP131 | syntaxin of plants 131	0	7.33055
	TRINITY_DN82743_c0_g1_i1	AT3G14640.1	CYP72A10 | cytochrome P450, family 72, subfamily A, polypeptide 10	0	-10.7285
	TRINITY_DN91391_c0_g1_i1	AT3G17770.1	Dihydroxyacetone kinase	0	-8.7731
	TRINITY_DN99193_c0_g1_i1	AT3G05560.3	Ribosomal L22e protein family	0	-3.76511
Up-Reguated	TRINITY_DN57641_c0_g1_i1	AT2G44130.1	Galactose oxidase/kelch repeat superfamily protein	2.11295	0
	TRINITY_DN54306_c0_g1_i1	AT5G10970.1	C2H2 and C2HC zinc fingers superfamily protein	2.16006	0
	TRINITY_DN64856_c0_g2_i2	AT1G27752.1	Ubiquitin system component Cue protein	2.21377	0
	TRINITY_DN52025_c0_g1_i1	AT4G08250.1	GRAS family transcription factor	2.22053	0
	TRINITY_DN65877_c0_g1_i1	AT1G70060.1	SNL4 | SIN3-like 4	2.22526	0
	TRINITY_DN47901_c0_g1_i1	AT2G19810.1	CCCH-typezincfingerfamilyprotein	2.26946	0
	TRINITY_DN56913_c0_g1_i1	AT3G15450.2	Aluminium induced protein with YGL and LRDR motifs	2.30468	0
	TRINITY_DN66001_c0_g2_i2	AT4G15550.1	IAGLU | indole-3-acetate beta-D-glucosyltransferase	2.32785	0
	TRINITY_DN54328_c0_g1_i1	AT1G68490.1	unknown protein	2.33127	0
	TRINITY_DN54478_c0_g1_i2	AT5G44300.1	Dormancy/auxin associated family protein	2.33149	0
	TRINITY_DN84081_c0_g1_i1	AT4G10270.1	Wound-responsive family protein	2.33439	0
	TRINITY_DN54325_c0_g1_i1	AT4G32480.1	Protein of unknown function (DUF506)	2.36942	0
	TRINITY_DN64148_c0_g1_i4	AT4G12280.1	copper amine oxidase family protein	2.38548	0
	TRINITY_DN66404_c0_g1_i4	AT1G14130.1	2-oxoglutarate (2OG) and Fe(II)-dependent oxygenase superfamily protein	2.38648	0
	TRINITY_DN54478_c0_g1_i4	AT1G28330.1	DRM1, DYL1 | dormancy-associated protein-like 1	2.48559	0
	TRINITY_DN57214_c0_g1_i1	AT5G44300.1	Dormancy/auxin associated family protein	2.59045	0
	TRINITY_DN57214_c0_g1_i1	AT5G44300.1	Dormancy/auxin associated family protein	2.59045	0
	TRINITY_DN50714_c0_g1_i1	AT5G22390.1	Protein of unknown function (DUF3049)	2.59489	0
	TRINITY_DN50714_c0_g1_i1	AT5G22390.1	Protein of unknown function (DUF3049)	2.59489	0
	TRINITY_DN12435_c0_g1_i1	AT5G37770.1	TCH2,CML24|EFhandcalcium-bindingproteinfamily	2.59659	0
	TRINITY_DN58522_c0_g1_i2	AT1G56300.1	Chaperone DnaJ-domain superfamily protein	2.63109	0
	TRINITY_DN56762_c0_g2_i1	AT5G60680.1	Protein of unknown function, DUF584	2.66893	0
	TRINITY_DN58415_c0_g1_i2	AT1G62670.1	RPF2 | rna processing factor 2	2.66984	0
	TRINITY_DN63398_c0_g1_i7	AT1G47380.1	Protein phosphatase 2C family protein	2.67107	0
	TRINITY_DN52381_c0_g1_i1	AT5G56550.1	OXS3, ATOXS3 | oxidative stress 3	2.71634	0
	TRINITY_DN52381_c0_g1_i1	AT5G56550.1	OXS3, ATOXS3 | oxidative stress 3	2.71634	0
	TRINITY_DN57405_c0_g1_i3	AT2G15890.1	MEE14 | maternal effect embryo arrest 14	2.83985	0
	TRINITY_DN57442_c0_g1_i2	AT5G64680.2	unknown protein	2.88827	0
	TRINITY_DN58719_c0_g1_i2	AT4G35750.1	SEC14 cytosolic factor family protein / phosphoglyceride transfer family protein	2.92007	0
	TRINITY_DN58719_c0_g1_i2	AT4G35750.1	SEC14 cytosolic factor family protein / phosphoglyceride transfer family protein	2.92007	0
	TRINITY_DN66404_c0_g1_i5	AT1G14130.1	2-oxoglutarate (2OG) and Fe(II)-dependent oxygenase superfamily protein	2.99019	0
	TRINITY_DN56918_c0_g1_i2	AT3G15040.1	Protein of unknown function, DUF584	3.15668	0
	TRINITY_DN65747_c0_g2_i1	AT3G60590.2	unknown protein	3.16164	0
	TRINITY_DN12435_c0_g2_i1	AT5G37770.1	TCH2,CML24|EFhandcalcium-bindingproteinfamily	3.16558	0
	TRINITY_DN65892_c0_g1_i7	AT5G08550.1	ILP1 | GC-rich sequence DNA-binding factor-like protein	3.19203	0
	TRINITY_DN57096_c0_g1_i1	AT1G25440.1	B-box type zinc finger protein with CCT domain	3.40498	0
	TRINITY_DN57096_c0_g1_i1	AT1G25440.1	B-box type zinc finger protein with CCT domain	3.40498	0
	TRINITY_DN65746_c0_g1_i1	AT2G19450.1	TAG1, AS11, ABX45, DGAT1, RDS1, ATDGAT | membrane bound O-acyl transferase (MBOAT) family protein	3.46803	0
	TRINITY_DN63885_c0_g1_i2	AT5G50260.1	Cysteine proteinases superfamily protein	3.58315	0
	TRINITY_DN63800_c0_g1_i6	AT2G39340.1	SAC3/GANP/Nin1/mts3/eIF-3 p25 family	3.59452	0
	TRINITY_DN65566_c0_g1_i5	AT3G07700.2	Protein kinase superfamily protein	3.72292	0
	TRINITY_DN57405_c0_g1_i1	AT2G15890.1	MEE14 | maternal effect embryo arrest 14	3.72799	0
	TRINITY_DN57405_c0_g1_i1	AT2G15890.1	MEE14 | maternal effect embryo arrest 14	3.72799	0
	TRINITY_DN47000_c0_g1_i7	AT4G36850.1	PQ-looprepeatfamilyprotein/transmembranefamilyprotein	3.75024	0
	TRINITY_DN54478_c0_g1_i1	AT1G28330.1	DRM1, DYL1 | dormancy-associated protein-like 1	3.77529	0
	TRINITY_DN54478_c0_g1_i1	AT1G28330.1	DRM1, DYL1 | dormancy-associated protein-like 1	3.77529	0
	TRINITY_DN56753_c0_g1_i1	AT2G19330.1	PIRL6 | plant intracellular ras group-related LRR 6	3.81094	0
	TRINITY_DN65396_c0_g1_i8	AT1G04970.2	lipid-binding serum glycoprotein family protein	4.00173	0
	TRINITY_DN65157_c1_g1_i6	AT2G39280.1	Ypt/Rab-GAP domain of gyp1p superfamily protein	4.15191	0
	TRINITY_DN65765_c0_g1_i1	AT1G70610.1	ATTAP1, TAP1 | transporter associated with antigen processing protein 1	4.2432	0
	TRINITY_DN55038_c0_g1_i1	AT4G00100.1	ATRPS13A, RPS13, PFL2, RPS13A | ribosomal protein S13A	4.65474	0
	TRINITY_DN63341_c0_g1_i2	AT3G24880.1	Helicase/SANT-associated, DNA binding protein	4.671	0
	TRINITY_DN65235_c0_g1_i4	AT2G25290.3	Phox1 | Octicosapeptide/Phox/Bem1p (PB1) domain-containing protein / tetratricopeptide repeat (TPR)-containing protein	4.68988	0
	TRINITY_DN21755_c0_g1_i1	AT3G11940.2	ATRPS5A,AML1,RPS5A|ribosomalprotein5A	4.86827	0
	TRINITY_DN64370_c0_g1_i2	AT1G30520.1	AAE14 | acyl-activating enzyme 14	4.89615	0
	TRINITY_DN69176_c0_g1_i1	AT5G37780.1	CAM1, TCH1, ACAM-1 | calmodulin 1	4.99499	0
	TRINITY_DN57494_c0_g1_i9	AT1G03010.1	Phototropic-responsive NPH3 family protein	5.0055	0
	TRINITY_DN57494_c0_g1_i9	AT1G03010.1	Phototropic-responsive NPH3 family protein	5.0055	0
	TRINITY_DN38557_c0_g2_i1	AT2G41840.1	RibosomalproteinS5familyprotein	5.11101	0
	TRINITY_DN29703_c0_g1_i1	AT1G07810.1	ECA1,ATECA1,ACA3|ER-typeCa2+-ATPase1	5.15339	0
	TRINITY_DN56698_c0_g1_i1	AT5G02320.2	MYB3R-5 | myb domain protein 3r-5	5.20125	0
	TRINITY_DN85130_c0_g1_i1	AT2G38810.2	HTA8 | histone H2A 8	5.24281	0
	TRINITY_DN89455_c0_g1_i1	AT5G67510.1	Translation protein SH3-like family protein	5.27263	0
	TRINITY_DN104927_c0_g1_i1	AT2G28320.1	Pleckstrinhomology(PH)andlipid-bindingSTARTdomains-containingprotein	5.3613	0
	TRINITY_DN45355_c0_g1_i1	AT2G27710.3	60Sacidicribosomalproteinfamily	5.45784	0
	TRINITY_DN57811_c0_g1_i1	AT1G02970.1	WEE1, ATWEE1 | WEE1 kinase homolog	5.46376	0
	TRINITY_DN64938_c0_g1_i7	AT5G07950.1	unknown protein	5.55802	0
	TRINITY_DN36529_c0_g1_i1	AT4G36130.1	RibosomalproteinL2family	5.57124	0
	TRINITY_DN5186_c0_g1_i1	AT4G09800.1	RPS18C | S18 ribosomal protein	5.59032	0
	TRINITY_DN63493_c0_g1_i1	AT4G20910.2	double-stranded RNA binding protein-related / DsRBD protein-related	5.59872	0
	TRINITY_DN75583_c0_g1_i1	AT3G07110.1	Ribosomal protein L13 family protein	5.78905	0
	TRINITY_DN90725_c0_g1_i1	AT4G27090.1	Ribosomal protein L14	5.85267	0
	TRINITY_DN97496_c0_g1_i1	AT3G09630.1	Ribosomal protein L4/L1 family	5.87085	0
	TRINITY_DN36648_c0_g1_i1	AT3G48850.1	PHT3;2|phosphatetransporter3;2	5.88223	0
	TRINITY_DN63385_c0_g1_i5	AT4G00990.1	Transcription factor jumonji (jmjC) domain-containing protein	5.97346	0
	TRINITY_DN54652_c0_g1_i3	AT1G76450.1	Photosystem II reaction center PsbP family protein	6.00073	0
	TRINITY_DN65534_c0_g1_i4	AT1G10910.1	Pentatricopeptide repeat (PPR) superfamily protein	6.0596	0
	TRINITY_DN83074_c0_g1_i1	AT2G42740.1	RPL16A | ribosomal protein large subunit 16A	6.07655	0
	TRINITY_DN104625_c0_g1_i1	AT3G55280.2	RPL23AB|ribosomalproteinL23AB	6.0771	0
	TRINITY_DN93367_c0_g1_i1	AT4G29160.2	SNF7.1 | SNF7 family protein	6.08291	0
	TRINITY_DN68519_c0_g1_i1	AT5G10810.1	ATER, ER | enhancer of rudimentary protein, putative	6.09258	0
	TRINITY_DN54401_c0_g1_i3	AT5G63490.1	CBS / octicosapeptide/Phox/Bemp1 (PB1) domains-containing protein	6.10352	0
	TRINITY_DN54401_c0_g1_i3	AT5G63490.1	CBS / octicosapeptide/Phox/Bemp1 (PB1) domains-containing protein |	6.10352	0
	TRINITY_DN5742_c0_g1_i1	AT5G60360.1	SAG2, AALP, ALP | aleurain-like protease	6.12356	0
	TRINITY_DN104715_c0_g1_i1	AT3G55440.1	ATCTIMC,TPI,CYTOTPI|triosephosphateisomerase	6.15432	0
	TRINITY_DN69109_c0_g1_i1	AT1G74060.1	Ribosomal protein L6 family protein	6.15912	0
	TRINITY_DN96932_c0_g1_i1	AT3G44100.1	MD-2-related lipid recognition domain-containing protein	6.19034	0
	TRINITY_DN54401_c0_g1_i2	AT5G63490.1	CBS / octicosapeptide/Phox/Bemp1 (PB1) domains-containing protein	6.19521	0
	TRINITY_DN41024_c0_g2_i1	AT3G11630.1	Thioredoxinsuperfamilyprotein	6.20314	0
	TRINITY_DN69135_c0_g1_i1	AT1G64040.1	TOPP3 | type one serine/threonine protein phosphatase 3	6.20436	0
	TRINITY_DN43263_c0_g2_i1	AT1G74270.1	RibosomalproteinL35Aefamilyprotein	6.20562	0
	TRINITY_DN107919_c0_g1_i1	AT5G60360.1	SAG2,AALP,ALP|aleurain-likeprotease	6.21027	0
	TRINITY_DN44161_c0_g1_i2	AT4G01130.1	GDSL-likeLipase/Acylhydrolasesuperfamilyprotein	6.21897	0
	TRINITY_DN106671_c0_g1_i1	AT5G59850.1	RibosomalproteinS8familyprotein	6.23528	0
	TRINITY_DN39247_c0_g1_i1	AT1G76650.3	CML38|calmodulin-like38	6.23647	0
	TRINITY_DN49035_c0_g1_i1	AT2G40010.1	Ribosomal protein L10 family protein	6.24408	0
	TRINITY_DN49035_c0_g1_i1	AT2G40010.1	Ribosomal protein L10 family protein	6.24408	0
	TRINITY_DN37421_c0_g1_i1	AT1G51710.2	UBP6|ubiquitin-specificprotease6	6.27796	0
	TRINITY_DN20584_c0_g2_i1	AT5G43060.1	Granulinrepeatcysteineproteasefamilyprotein	6.28446	0
	TRINITY_DN14162_c0_g1_i1	AT3G24830.1	RibosomalproteinL13familyprotein	6.29429	0
	TRINITY_DN83557_c0_g1_i1	AT5G26667.3	PYR6 | P-loop containing nucleoside triphosphate hydrolases superfamily protein	6.30184	0
	TRINITY_DN89749_c0_g1_i1	AT2G26300.1	GPA1, GP ALPHA 1, ATGPA1 | G protein alpha subunit 1	6.34656	0
	TRINITY_DN53095_c0_g1_i1	AT2G20635.1	ATP binding;protein kinases;protein serine/threonine kinases	6.34832	0
	TRINITY_DN74451_c0_g1_i1	AT3G01090.3	AKIN10, KIN10 | SNF1 kinase homolog 10	6.35168	0
	TRINITY_DN41513_c0_g1_i1	AT5G06580.1	FAD-linkedoxidasesfamilyprotein	6.3697	0
	TRINITY_DN50885_c0_g3_i1	AT1G02780.1	Ribosomal protein L19e family protein	6.37192	0
	TRINITY_DN38268_c0_g1_i1	AT4G24230.1	ACBP3|acyl-CoA-bindingdomain3	6.37303	0
	TRINITY_DN51294_c1_g1_i1	AT4G30800.1	Nucleic acid-binding, OB-fold-like protein	6.37794	0
	TRINITY_DN51294_c1_g1_i1	AT4G30800.1	Nucleic acid-binding, OB-fold-like protein	6.37794	0
	TRINITY_DN47271_c0_g1_i1	AT5G60790.1	ATGCN1,GCN1|ABCtransporterfamilyprotein	6.38732	0
	TRINITY_DN89456_c1_g1_i1	AT1G66200.1	ATGSR2, GSR2, GLN1;2 | glutamine synthase clone F11	6.3915	0
	TRINITY_DN41404_c0_g1_i1	AT3G60245.1	Zinc-bindingribosomalproteinfamilyprotein	6.40654	0
	TRINITY_DN17190_c0_g1_i1	AT1G61580.1	RPL3B,ARP2|R-proteinL3B	6.42334	0
	TRINITY_DN32879_c0_g1_i1	AT1G26120.1	ICME-LIKE1|alpha/beta-Hydrolasessuperfamilyprotein	6.42666	0
	TRINITY_DN13381_c0_g1_i1	AT4G10040.1	CYTC-2|cytochromec-2	6.4484	0
	TRINITY_DN50534_c0_g1_i1	AT2G36840.1	ACT-like superfamily protein	6.45652	0
	TRINITY_DN34333_c0_g1_i1	AT1G67430.1	RibosomalproteinL22p/L17efamilyprotein	6.45752	0
	TRINITY_DN97273_c0_g1_i1	AT3G11400.1	EIF3G1, ATEIF3G1 | eukaryotic translation initiation factor 3G1	6.47673	0
	TRINITY_DN90162_c0_g1_i1	AT4G34490.1	ATCAP1, CAP 1, CAP1 | cyclase associated protein 1	6.47988	0
	TRINITY_DN65605_c0_g1_i5	AT1G59870.1	PEN3, PDR8, ATPDR8, ABCG36, ATABCG36 | ABC-2 and Plant PDR ABC-type transporter family protein	6.48366	0
	TRINITY_DN69242_c0_g1_i1	AT1G74270.1	Ribosomal protein L35Ae family protein	6.48681	0
	TRINITY_DN67200_c0_g1_i1	AT3G51030.1	ATTRX1, ATTRX H1, TRX1 | thioredoxin H-type 1	6.49851	0
	TRINITY_DN64205_c0_g2_i30	AT4G26310.1	elongation factor P (EF-P) family protein	6.49914	0
	TRINITY_DN108586_c0_g1_i1	AT5G67540.1	Arabinanase/levansucrase/invertase	6.55626	0
	TRINITY_DN47271_c0_g4_i1	AT5G60790.1	ATGCN1,GCN1|ABCtransporterfamilyprotein	6.56036	0
	TRINITY_DN6480_c0_g1_i1	AT3G56340.1	Ribosomal protein S26e family protein	6.56391	0
	TRINITY_DN87880_c0_g1_i1	AT1G27970.1	NTF2B | nuclear transport factor 2B	6.57251	0
	TRINITY_DN50372_c0_g1_i1	AT5G14180.1	MPL1 | Myzus persicae-induced lipase 1	6.58329	0
	TRINITY_DN54464_c0_g1_i3	AT2G41760.1	unknown protein	6.61431	0
	TRINITY_DN81903_c0_g1_i1	AT2G27600.1	SKD1, VPS4, ATSKD1 | AAA-type ATPase family protein	6.61786	0
	TRINITY_DN29879_c0_g1_i1	AT1G72370.2	P40,AP40,RP40,RPSAA|40sribosomalproteinSA	6.62529	0
	TRINITY_DN49233_c1_g2_i1	AT5G62300.2	Ribosomal protein S10p/S20e family protein	6.62968	0
	TRINITY_DN51971_c0_g1_i2	AT5G60390.3	GTP binding Elongation factor Tu family protein	6.6327	0
	TRINITY_DN66611_c0_g1_i3	AT1G15520.1	PDR12, ATPDR12, ABCG40, ATABCG40 | pleiotropic drug resistance 12	6.63606	0
	TRINITY_DN65900_c0_g1_i1	AT2G43490.6	Ypt/Rab-GAP domain of gyp1p superfamily protein	6.63764	0
	TRINITY_DN45126_c0_g2_i1	AT2G34480.1	RibosomalproteinL18ae/Lxfamilyprotein	6.63816	0
	TRINITY_DN67074_c0_g1_i1	AT4G09800.1	RPS18C | S18 ribosomal protein	6.64339	0
	TRINITY_DN83544_c0_g1_i1	AT1G58370.1	RXF12, ATXYN1 | glycosyl hydrolase family 10 protein / carbohydrate-binding domain-containing protein	6.64435	0
	TRINITY_DN44932_c0_g1_i1	AT2G19770.1	PRF5|profilin5	6.64842	0
	TRINITY_DN42414_c0_g1_i1	AT3G20050.1	ATTCP-1,TCP-1|T-complexprotein1alphasubunit	6.6507	0
	TRINITY_DN42417_c1_g1_i1	AT5G39740.2	RPL5B|ribosomalproteinL5B	6.66678	0
	TRINITY_DN76997_c0_g1_i1	AT2G16790.1	P-loop containing nucleoside triphosphate hydrolases superfamily protein	6.66811	0
	TRINITY_DN74752_c0_g1_i1	AT1G15330.1	Cystathionine beta-synthase (CBS) protein	6.69885	0
	TRINITY_DN56783_c0_g1_i9	AT4G18460.1	D-Tyr-tRNA(Tyr) deacylase family protein	6.71236	0
	TRINITY_DN65599_c0_g1_i8	AT5G22450.1	unknown protein; LOCATED IN: chloroplast	6.71962	0
	TRINITY_DN105366_c0_g1_i1	AT3G02780.1	IPP2,IPIAT1,IDI2|isopentenylpyrophosphate:dimethylallylpyrophosphateisomerase2	6.73088	0
	TRINITY_DN41383_c0_g1_i1	AT3G11710.1	ATKRS-1|lysyl-tRNAsynthetase1	6.734	0
	TRINITY_DN53918_c0_g2_i1	AT5G11170.2	DEAD/DEAH box RNA helicase family protein	6.73947	0
	TRINITY_DN98162_c0_g1_i1	AT3G23150.1	ETR2 | Signal transduction histidine kinase, hybrid-type, ethylene sensor	6.75302	0
	TRINITY_DN58192_c0_g1_i2	AT1G78600.1	LZF1, STH3, DBB3 | light-regulated zinc finger protein 1	6.75721	0
	TRINITY_DN89399_c0_g1_i1	AT4G18100.1	Ribosomal protein L32e	6.78083	0
	TRINITY_DN58727_c0_g1_i5	AT1G63700.1	EMB71, YDA, MAPKKK4 | Protein kinase superfamily protein	6.78152	0
	TRINITY_DN58727_c0_g1_i5	AT1G63700.1	EMB71, YDA, MAPKKK4 | Protein kinase superfamily protein	6.78152	0
	TRINITY_DN40430_c0_g1_i2	AT3G11730.1	ATFP8,ATRABD1,RABD1|Ras-relatedsmallGTP-bindingfamilyprotein	6.7917	0
	TRINITY_DN17948_c0_g2_i1	AT1G66810.1	ZincfingerC-x8-C-x5-C-x3-Htypefamilyprotein	6.79258	0
	TRINITY_DN63302_c0_g1_i3	AT3G59340.1	Eukaryotic protein of unknown function (DUF914)	6.79557	0
	TRINITY_DN66451_c0_g2_i2	AT5G14580.1	polyribonucleotide nucleotidyltransferase, putative	6.81217	0
	TRINITY_DN23511_c0_g2_i1	AT2G46680.2	ATHB-7,ATHB7,HB-7|homeobox7	6.82175	0
	TRINITY_DN89736_c0_g1_i1	AT1G52300.1	Zinc-binding ribosomal protein family protein	6.82794	0
	TRINITY_DN47626_c0_g1_i1	AT5G66020.1	IBS2,ATSAC1B,ATSAC6,SACIB|Phosphoinositidephosphatasefamilyprotein	6.83074	0
	TRINITY_DN69778_c0_g1_i1	AT3G28900.1	Ribosomal protein L34e superfamily protein	6.83314	0
	TRINITY_DN89802_c0_g1_i1	AT2G16120.1	PMT1, ATPMT1 | polyol/monosaccharide transporter 1	6.83389	0
	TRINITY_DN1591_c0_g1_i2	AT4G17390.1	RibosomalproteinL23/L15efamilyprotein	6.84713	0
	TRINITY_DN34344_c0_g1_i1	AT3G09630.2	RibosomalproteinL4/L1family	6.84718	0
	TRINITY_DN105412_c0_g1_i1	AT5G24270.2	SOS3|Calcium-bindingEF-handfamilyprotein	6.84976	0
	TRINITY_DN18064_c0_g2_i1	AT4G10450.1	RibosomalproteinL6family	6.86615	0
	TRINITY_DN55956_c0_g1_i4	AT3G15380.1	Plasma-membrane choline transporter family protein	6.88569	0
	TRINITY_DN83231_c0_g1_i1	AT5G46180.1	DELTA-OAT | ornithine-delta-aminotransferase	6.89828	0
	TRINITY_DN52045_c0_g3_i1	AT4G34670.1	Ribosomal protein S3Ae	6.89867	0
	TRINITY_DN57179_c0_g2_i1	AT1G56070.1	LOS1 | Ribosomal protein S5/Elongation factor G/III/V family protein	6.90127	0
	TRINITY_DN57179_c0_g2_i1	AT1G56070.1	LOS1 | Ribosomal protein S5/Elongation factor G/III/V family protein	6.90127	0
	TRINITY_DN49754_c0_g1_i1	AT5G15200.1	Ribosomal protein S4	6.90466	0
	TRINITY_DN52858_c0_g1_i2	AT2G25737.1	Sulfite exporter TauE/SafE family protein	6.90515	0
	TRINITY_DN106093_c0_g1_i1	AT3G23830.2	GR-RBP4,GRP4|glycine-richRNA-bindingprotein4	6.9115	0
	TRINITY_DN106093_c0_g1_i1	AT3G23830.2	GR-RBP4,GRP4|glycine-richRNA-bindingprotein	6.9115	0
	TRINITY_DN66627_c0_g1_i1	AT1G47720.1	OSB1 | Primosome PriB/single-strand DNA-binding	6.91561	0
	TRINITY_DN104885_c0_g1_i1	AT4G16210.1	CHIA,E-COAH-2|enoyl-CoAhydratase/isomeraseA	6.92111	0
	TRINITY_DN91783_c0_g1_i1	AT3G08690.2	UBC11 | ubiquitin-conjugating enzyme 11	6.9266	0
	TRINITY_DN72174_c0_g1_i1	AT5G65690.1	PCK2, PEPCK | phosphoenolpyruvate carboxykinase 2	6.93371	0
	TRINITY_DN91858_c0_g1_i1	AT1G62290.2	Saposin-like aspartyl protease family protein	6.96748	0
	TRINITY_DN106344_c0_g1_i1	AT3G48560.1	CSR1,ALS,AHAS,TZP5,IMR1|chlorsulfuron/imidazolinoneresistant1	6.9759	0
	TRINITY_DN29707_c0_g2_i1	AT2G44120.1	RibosomalproteinL30/L7familyprotein	6.98488	0
	TRINITY_DN89806_c0_g1_i1	AT3G05590.1	RPL18 | ribosomal protein L18	6.98954	0
	TRINITY_DN46647_c0_g1_i1	AT1G75390.1	AtbZIP44,bZIP44|basicleucine-zipper44	7.0073	0
	TRINITY_DN105437_c0_g1_i1	AT3G51300.1	ARAC11,ROP1,ROP1AT,ATRAC11,ATROP1|RHO-relatedproteinfromplants1	7.01857	0
	TRINITY_DN81825_c0_g1_i1	AT2G32060.2	Ribosomal protein L7Ae/L30e/S12e/Gadd45 family protein	7.02117	0
	TRINITY_DN50499_c0_g1_i2	AT5G14040.1	PHT3;1 | phosphate transporter 3;1	7.03767	0
	TRINITY_DN50499_c0_g1_i2	AT5G14040.1	PHT3;1 | phosphate transporter 3;1	7.03767	0
	TRINITY_DN43415_c0_g1_i1	AT1G56070.1	LOS1|RibosomalproteinS5/ElongationfactorG/III/Vfamilyprotein	7.0461	0
	TRINITY_DN68204_c0_g1_i1	AT4G24960.3	HVA22D | HVA22 homologue D	7.05837	0
	TRINITY_DN89182_c0_g1_i1	AT4G25740.2	RNA binding Plectin/S10 domain-containing protein	7.06174	0
	TRINITY_DN46331_c0_g1_i1	AT5G27850.1	RibosomalproteinL18e/L15superfamilyprotein	7.08184	0
	TRINITY_DN82986_c0_g1_i1	AT5G48140.1	Pectin lyase-like superfamily protein	7.08632	0
	TRINITY_DN48200_c0_g1_i6	AT5G46390.1	Peptidase S41 family protein	7.08651	0
	TRINITY_DN52740_c0_g1_i1	AT5G28840.2	GME | GDP-D-mannose 3',5'-epimerase	7.08706	0
	TRINITY_DN43997_c1_g1_i1	AT1G70600.1	RibosomalproteinL18e/L15superfamilyprotein	7.09357	0
	TRINITY_DN104529_c0_g1_i1	AT5G16130.1	RibosomalproteinS7efamilyprotein	7.1031	0
	TRINITY_DN66332_c0_g2_i6	AT5G45140.1	NRPC2 | nuclear RNA polymerase C2	7.12267	0
	TRINITY_DN81768_c0_g1_i1	AT2G16130.1	PMT2, ATPMT2 | polyol/monosaccharide transporter 2	7.13516	0
	TRINITY_DN54282_c1_g1_i1	AT5G22440.2	Ribosomal protein L1p/L10e family	7.14567	0
	TRINITY_DN40619_c0_g1_i1	AT4G35020.3	RAC3|RAC-like3	7.15816	0
	TRINITY_DN53351_c0_g1_i1	AT5G10330.2	EMB2196, HPA1, HISN6A, ATHPA1 | histidinol phosphate aminotransferase 1	7.16583	0
	TRINITY_DN53351_c0_g1_i1	AT5G10330.2	EMB2196, HPA1, HISN6A, ATHPA1 | histidinol phosphate aminotransferase 1	7.16583	0
	TRINITY_DN50784_c0_g1_i1	AT1G15930.1	Ribosomal protein L7Ae/L30e/S12e/Gadd45 family protein	7.18424	0
	TRINITY_DN50784_c0_g1_i1	AT1G15930.1	Ribosomal protein L7Ae/L30e/S12e/Gadd45 family protein	7.18424	0
	TRINITY_DN91089_c0_g1_i1	AT4G18040.1	EIF4E, CUM1, AT.EIF4E1, eIF4E1 | eukaryotic translation initiation factor 4E	7.20056	0
	TRINITY_DN66649_c0_g1_i1	AT3G08800.1	ARM repeat superfamily protein	7.21904	0
	TRINITY_DN66206_c0_g1_i11	AT4G27340.1	Met-10+ like family protein	7.23656	0
	TRINITY_DN63935_c0_g1_i6	AT1G54570.1	Esterase/lipase/thioesterase family protein	7.24269	0
	TRINITY_DN98572_c0_g1_i1	AT4G17770.1	ATTPS5, TPS5 | trehalose phosphatase/synthase 5	7.25298	0
	TRINITY_DN104380_c0_g1_i1	AT4G17300.1	NS1,OVA8,ATNS1|ClassIIaminoacyl-tRNAandbiotinsynthetasessuperfamilyprotein	7.27354	0
	TRINITY_DN25867_c0_g1_i1	AT3G04920.1	RibosomalproteinS24efamilyprotein	7.27604	0
	TRINITY_DN26024_c0_g1_i1	AT5G02450.1	Ribosomal protein L36e family protein	7.2964	0
	TRINITY_DN106490_c0_g1_i1	AT3G27440.1	UKL5|uridinekinase-like5	7.30086	0
	TRINITY_DN48746_c0_g1_i1	AT3G01320.1	SNL1 | SIN3-like 1	7.30973	0
	TRINITY_DN66414_c0_g1_i8	AT3G53540.1	unknown protein; LOCATED IN: plasma membrane	7.31399	0
	TRINITY_DN65387_c0_g1_i8	AT5G19500.1	Tryptophan/tyrosine permease	7.32249	0
	TRINITY_DN92065_c0_g1_i1	AT4G21585.1	ENDO4 | endonuclease 4	7.34835	0
	TRINITY_DN68327_c0_g1_i1	AT3G04580.2	EIN4 | Signal transduction histidine kinase, hybrid-type, ethylene sensor	7.36198	0
	TRINITY_DN28674_c0_g1_i1	AT3G48780.1	ATSPT1,SPT1|serinepalmitoyltransferase1	7.36388	0
	TRINITY_DN47940_c0_g1_i1	AT5G04800.4	RibosomalS17familyprotein	7.37499	0
	TRINITY_DN89475_c0_g1_i1	AT2G44860.2	Ribosomal protein L24e family protein	7.38033	0
	TRINITY_DN53226_c0_g1_i1	AT3G16640.1	TCTP | translationally controlled tumor protein	7.405	0
	TRINITY_DN53226_c0_g1_i1	AT3G16640.1	TCTP | translationally controlled tumor protein	7.405	0
	TRINITY_DN75132_c0_g1_i1	AT4G29510.1	ATPRMT11, PRMT11, ATPRMT1B, PRMT1B | arginine methyltransferase 11	7.41826	0
	TRINITY_DN93763_c0_g1_i1	AT5G01930.1	MAN6, AtMAN6 | Glycosyl hydrolase superfamily protein	7.43247	0
	TRINITY_DN66278_c0_g1_i14	AT1G33540.1	scpl18 | serine carboxypeptidase-like 18	7.44772	0
	TRINITY_DN56961_c0_g1_i1	AT5G58620.1	zinc finger (CCCH-type) family protein	7.4516	0
	TRINITY_DN56961_c0_g1_i1	AT5G58620.1	zinc finger (CCCH-type) family protein	7.4516	0
	TRINITY_DN66085_c0_g1_i2	AT3G43610.1	Spc97 / Spc98 family of spindle pole body (SBP) component	7.46825	0
	TRINITY_DN63617_c0_g1_i5	AT4G32180.3	ATPANK2, PANK2 | pantothenate kinase 2	7.47544	0
	TRINITY_DN64779_c0_g1_i3	AT2G03340.1	WRKY3 | WRKY DNA-binding protein 3	7.49454	0
	TRINITY_DN57594_c0_g1_i7	AT5G10100.2	TPPI | Haloacid dehalogenase-like hydrolase (HAD) superfamily protein	7.49814	0
	TRINITY_DN57594_c0_g1_i7	AT5G10100.2	TPPI | Haloacid dehalogenase-like hydrolase (HAD) superfamily protein	7.49814	0
	TRINITY_DN35805_c0_g1_i1	AT1G75630.1	AVA-P4|vacuolarH+-pumpingATPase16kDaproteolipidsubunit4	7.4983	0
	TRINITY_DN75916_c0_g1_i1	AT2G19770.1	PRF5 | profilin 5	7.50276	0
	TRINITY_DN41153_c0_g3_i1	AT1G66580.1	SAG24,RPL10C|senescenceassociatedgene24	7.51545	0
	TRINITY_DN89186_c0_g1_i1	AT3G52930.1	Aldolase superfamily protein	7.5266	0
	TRINITY_DN65162_c0_g1_i8	AT3G45100.2	SETH2 | UDP-Glycosyltransferase superfamily protein	7.54091	0
	TRINITY_DN21485_c0_g1_i1	AT5G23660.1	MTN3,SWEET12,AtSWEET12|homologofMedicagotruncatulaMTN3	7.57605	0
	TRINITY_DN36241_c0_g2_i1	AT1G73230.1	Nascentpolypeptide-associatedcomplexNAC	7.58795	0
	TRINITY_DN54452_c0_g1_i2	AT3G49340.1	Cysteine proteinases superfamily protein	7.59593	0
	TRINITY_DN54452_c0_g1_i2	AT3G49340.1	Cysteine proteinases superfamily protein	7.59593	0
	TRINITY_DN68696_c0_g1_i1	AT1G30230.1	Glutathione S-transferase, C-terminal-like;Translation elongation factor EF1B/ribosomal protein S6	7.62691	0
	TRINITY_DN66114_c0_g1_i4	AT2G25530.1	AFG1-like ATPase family protein	7.63392	0
	TRINITY_DN5558_c0_g2_i1	AT1G67430.1	Ribosomal protein L22p/L17e family protein	7.64691	0
	TRINITY_DN82693_c0_g1_i1	AT3G06680.1	Ribosomal L29e protein family	7.65772	0
	TRINITY_DN65777_c0_g1_i4	AT1G66330.2	senescence-associated family protein	7.66653	0
	TRINITY_DN83506_c0_g1_i1	AT5G43340.1	PHT6, PHT1;6 | phosphate transporter 1;6	7.68869	0
	TRINITY_DN49790_c0_g1_i1	AT3G49010.4	ATBBC1, BBC1, RSU2 | breast basic conserved 1	7.69171	0
	TRINITY_DN90914_c0_g1_i1	AT4G14880.4	OASA1 | O-acetylserine (thiol) lyase (OAS-TL) isoform A1	7.69171	0
	TRINITY_DN76504_c0_g1_i1	AT2G04520.1	Nucleic acid-binding, OB-fold-like protein	7.71711	0
	TRINITY_DN82099_c0_g1_i1	AT2G46210.1	Fatty acid/sphingolipid desaturase	7.72999	0
	TRINITY_DN65465_c0_g1_i1	AT5G58040.1	ATFIP1[V], FIPS5, ATFIPS5, FIP1[V] | homolog of yeast FIP1 [V]	7.75364	0
	TRINITY_DN67703_c0_g1_i1	AT4G27270.1	Quinone reductase family protein	7.80326	0
	TRINITY_DN1298_c0_g2_i1	AT1G09690.1	TranslationproteinSH3-likefamilyprotein	7.82642	0
	TRINITY_DN47263_c0_g1_i1	AT5G58420.1	RibosomalproteinS4(RPS4A)familyprotein	7.85656	0
	TRINITY_DN51640_c0_g1_i1	AT4G28680.4	TYRDC | L-tyrosine decarboxylase	7.8666	0
	TRINITY_DN51640_c0_g1_i1	AT4G28680.4	TYRDC | L-tyrosine decarboxylase	7.8666	0
	TRINITY_DN4367_c0_g2_i1	AT2G09990.1	RibosomalproteinS5domain2-likesuperfamilyprotein	7.87199	0
	TRINITY_DN106810_c0_g1_i1	AT2G34480.1	RibosomalproteinL18ae/Lxfamilyprotein	7.88833	0
	TRINITY_DN75198_c0_g1_i1	AT3G16640.1	TCTP | translationally controlled tumor protein	7.8983	0
	TRINITY_DN68421_c0_g1_i1	AT1G01100.3	60S acidic ribosomal protein family	7.89964	0
	TRINITY_DN91632_c0_g1_i1	AT1G12440.2	A20/AN1-like zinc finger family protein	7.90058	0
	TRINITY_DN8201_c0_g1_i1	AT3G23610.1	DSPTP1 | dual specificity protein phosphatase 1	7.9402	0
	TRINITY_DN63983_c0_g1_i1	AT1G51340.2	MATE efflux family protein	7.94246	0
	TRINITY_DN85475_c0_g1_i1	AT3G05930.1	GLP8 | germin-like protein 8	7.95753	0
	TRINITY_DN51971_c0_g1_i1	AT5G60390.3	GTP binding Elongation factor Tu family protein	7.98252	0
	TRINITY_DN51971_c0_g1_i1	AT5G60390.3	GTP binding Elongation factor Tu family protein	7.98252	0
	TRINITY_DN18984_c0_g2_i1	AT5G02960.1	RibosomalproteinS12/S23familyprotein	7.99173	0
	TRINITY_DN37654_c0_g2_i2	AT2G37190.1	RibosomalproteinL11familyprotein	8.01034	0
	TRINITY_DN96851_c0_g1_i1	AT4G36130.1	Ribosomal protein L2 family	8.01267	0
	TRINITY_DN75320_c0_g1_i1	AT5G13710.2	SMT1, CPH | sterol methyltransferase 1	8.02134	0
	TRINITY_DN46342_c0_g1_i1	AT2G18110.1	TranslationelongationfactorEF1B/ribosomalproteinS6familyprotein	8.04408	0
	TRINITY_DN58284_c0_g1_i1	AT1G09640.1	Translation elongation factor EF1B, gamma chain	8.05495	0
	TRINITY_DN58284_c0_g1_i1	AT1G09640.1	Translation elongation factor EF1B, gamma chain	8.05495	0
	TRINITY_DN38934_c0_g1_i1	AT5G02610.1	RibosomalL29familyprotein	8.05938	0
	TRINITY_DN81973_c0_g1_i1	AT1G43890.3	ATRAB18, ATRABC1, RAB18-1, RABC1, ATRAB-C1, RAB18 | RAB GTPASE HOMOLOG B18	8.06506	0
	TRINITY_DN63627_c0_g1_i3	AT5G27690.1	Heavy metal transport/detoxification superfamily protein	8.07778	0
	TRINITY_DN51835_c0_g2_i1	AT4G19640.1	ARA7, ARA-7, ATRABF2B, ATRAB5B, RABF2B, ATRAB-F2B, RAB-F2B | Ras-related small GTP-binding family protein	8.10813	0
	TRINITY_DN99518_c0_g1_i1	AT2G15230.1	ATLIP1, LIP1 | lipase 1	8.1117	0
	TRINITY_DN53663_c0_g1_i4	AT3G55580.1	Regulator of chromosome condensation (RCC1) family protein	8.12001	0
	TRINITY_DN53663_c0_g1_i4	AT3G55580.1	Regulator of chromosome condensation (RCC1) family protein	8.12001	0
	TRINITY_DN52116_c0_g1_i1	AT1G69410.1	ATELF5A-3, ELF5A-3 | eukaryotic elongation factor 5A-3	8.12579	0
	TRINITY_DN52116_c0_g1_i1	AT1G69410.1	ATELF5A-3, ELF5A-3 | eukaryotic elongation factor 5A-3	8.12579	0
	TRINITY_DN51812_c0_g1_i1	AT1G20850.1	XCP2 | xylem cysteine peptidase 2	8.12931	0
	TRINITY_DN107629_c0_g1_i1	AT2G26140.1	ftsh4|FTSHprotease4	8.14376	0
	TRINITY_DN98455_c0_g1_i1	AT1G30580.1	GTP binding	8.16097	0
	TRINITY_DN109012_c0_g1_i1	AT5G60620.1	glycerol-3-phosphateacyltransferase9	8.18329	0
	TRINITY_DN81821_c0_g1_i1	AT5G59240.1	Ribosomal protein S8e family protein	8.21083	0
	TRINITY_DN65341_c0_g1_i6	AT2G24530.1	unknown protein	8.24376	0
	TRINITY_DN18858_c0_g1_i1	AT5G35630.3	GS2,GLN2,ATGSL1|glutaminesynthetase2	8.25845	0
	TRINITY_DN23511_c0_g1_i1	AT2G46680.2	ATHB-7,ATHB7,HB-7|homeobox7	8.33093	0
	TRINITY_DN85729_c0_g1_i1	AT4G04930.1	DES-1-LIKE | fatty acid desaturase family protein	8.35016	0
	TRINITY_DN75225_c0_g1_i1	AT5G49180.1	Plant invertase/pectin methylesterase inhibitor superfamily	8.38618	0
	TRINITY_DN46100_c0_g3_i1	AT2G18110.1	TranslationelongationfactorEF1B/ribosomalproteinS6familyprotein	8.40072	0
	TRINITY_DN63556_c0_g1_i2	AT2G22400.1	S-adenosyl-L-methionine-dependent methyltransferases superfamily protein	8.40253	0
	TRINITY_DN97500_c0_g1_i1	AT2G21430.1	Papain family cysteine protease	8.44452	0
	TRINITY_DN48566_c0_g2_i1	AT4G28390.1	AAC3, ATAAC3 | ADP/ATP carrier 3	8.47172	0
	TRINITY_DN66439_c0_g1_i4	AT1G01320.2	Tetratricopeptide repeat (TPR)-like superfamily protein	8.49328	0
	TRINITY_DN105536_c0_g1_i1	AT2G43180.2	Phosphoenolpyruvatecarboxylasefamilyprotein	8.50148	0
	TRINITY_DN65733_c0_g1_i1	AT5G08430.1	SWIB/MDM2 domain;Plus-3;GYF	8.52565	0
	TRINITY_DN39408_c0_g1_i1	AT3G49010.3	ATBBC1,BBC1,RSU2|breastbasicconserved1	8.53412	0
	TRINITY_DN46983_c0_g3_i1	AT4G39200.2	RibosomalproteinS25familyprotein	8.56638	0
	TRINITY_DN40508_c0_g3_i1	AT3G53020.1	STV1,RPL24B,RPL24|RibosomalproteinL24efamilyprotein	8.56961	0
	TRINITY_DN3969_c0_g1_i1	AT1G61950.1	CPK19|calcium-dependentproteinkinase19	8.60366	0
	TRINITY_DN21909_c0_g1_i1	AT5G59300.1	UBC7,ATUBC7|ubiquitincarrierprotein7	8.66464	0
	TRINITY_DN48558_c0_g1_i2	AT2G22240.2	ATMIPS2, MIPS2, ATIPS2 | myo-inositol-1-phosphate synthase 2	8.70293	0
	TRINITY_DN48558_c0_g1_i2	AT2G22240.2	ATMIPS2, MIPS2, ATIPS2 | myo-inositol-1-phosphate synthase 2	8.70293	0
	TRINITY_DN66456_c0_g1_i5	AT2G34780.1	EMB1611, MEE22 | maternal effect embryo arrest 22	8.71801	0
	TRINITY_DN69294_c0_g1_i1	AT5G15520.1	Ribosomal protein S19e family protein	8.74353	0
	TRINITY_DN47565_c0_g2_i1	AT3G60245.1	Zinc-bindingribosomalproteinfamilyprotein	8.8308	0
	TRINITY_DN18858_c0_g1_i1	AT5G35630.3	GS2,GLN2,ATGSL1|glutaminesynthetase2	8.86854	0
	TRINITY_DN97075_c0_g1_i1	AT5G02960.1	Ribosomal protein S12/S23 family protein	8.88832	0
	TRINITY_DN41912_c0_g2_i1	AT1G13950.1	EIF-5A,ELF5A-1,ATELF5A-1,EIF5A|eukaryoticelongationfactor5A-1	8.91277	0
	TRINITY_DN89945_c0_g1_i1	AT3G04400.1	emb2171 | Ribosomal protein L14p/L23e family protein	8.93055	0
	TRINITY_DN64271_c0_g1_i1	AT2G24820.1	TIC55-II | translocon at the inner envelope membrane of chloroplasts 55-II	9.00488	0
	TRINITY_DN97412_c0_g1_i1	AT1G18610.1	Galactose oxidase/kelch repeat superfamily protein	9.02973	0
	TRINITY_DN89649_c0_g1_i1	AT4G35840.1	RING/U-box superfamily protein	9.07751	0
	TRINITY_DN10093_c0_g2_i1	AT1G06080.1	ADS1|delta9desaturase1	9.10696	0
	TRINITY_DN74463_c0_g1_i1	AT4G16370.1	ATOPT3, OPT3 | oligopeptide transporter	9.11594	0
	TRINITY_DN45207_c1_g1_i1	AT5G58420.1	RibosomalproteinS4(RPS4A)familyprotein	9.13508	0
	TRINITY_DN18150_c0_g1_i1	AT3G15720.1	Pectinlyase-likesuperfamilyprotein	9.21072	0
	TRINITY_DN65916_c0_g1_i2	AT1G10095.1	Protein prenylyltransferase superfamily protein	9.28688	0
	TRINITY_DN90514_c0_g1_i1	AT3G02260.1	BIG, DOC1, TIR3, UMB1, ASA1, LPR1, CRM1 | auxin transport protein (BIG)	9.30764	0
	TRINITY_DN65143_c0_g1_i1	AT4G01210.1	glycosyl transferase family 1 protein	9.34292	0
	TRINITY_DN66086_c0_g1_i2	AT1G10760.1	SEX1, SOP1, SOP, GWD1, GWD | Pyruvate phosphate dikinase, PEP/pyruvate binding domain	9.57132	0
	TRINITY_DN29703_c0_g1_i2	AT4G00900.1	ECA2,ATECA2|ER-typeCa2+-ATPase2	9.64577	0
	TRINITY_DN91577_c0_g1_i1	AT5G66720.1	Protein phosphatase 2C family protein	9.82955	0
	TRINITY_DN75904_c0_g1_i1	AT4G00680.1	ADF8 | actin depolymerizing factor 8	9.88376	0
	TRINITY_DN63794_c0_g1_i3	AT3G22590.1	PHP, CDC73 | PLANT HOMOLOGOUS TO PARAFIBROMIN	10.0142	0
	TRINITY_DN6978_c0_g1_i1	AT1G69100.1	Eukaryotic aspartyl protease family protein	10.1744	0
	TRINITY_DN54807_c0_g2_i1	AT5G60390.3	GTP binding Elongation factor Tu family protein	10.1981	0
	TRINITY_DN83426_c0_g1_i1	AT1G18610.1	Galactose oxidase/kelch repeat superfamily protein	10.4627	0
	TRINITY_DN104321_c0_g1_i1	AT5G36950.1	DegP10|DegPprotease10	11.1088	0
	TRINITY_DN89410_c0_g1_i1	AT1G64550.1	ATGCN3, GCN3 | general control non-repressible 3	12.7704	0
