# Supplementary material for: Functional categorization of de novo transcriptome assembly of Vanilla planifolia Jacks. potentially points to a translational regulation during early stages of infection by Fusarium oxysporum f. sp. vanillae
Source: BMC Genomics. 2019 Nov 8;20:826. doi: 10.1186/s12864-019-6229-5 (PMC6839141; doi:10.1186/s12864-019-6229-5)
Supplement: Supplementary file 8 — Additional file 8: Table S5. GO terms enrichment analysis, performed with the PANTHER classification system software (v.14.0). Gene Ontology categories significantly enriched in DEGs at 2 dpi, present in transcripts up regulated, in the infection caused by Fusarium in vanilla. In the table the Gene Ontology (GO) terms that are significantly (q ≤ 0.05) overrepresented using are observed. [file 12864_2019_6229_MOESM8_ESM.xlsx]

## Sheet: analysis (3)
Analysis Type:	PANTHER Overrepresentation Test (Released 20190711)
Annotation Version and Release Date:	GO Ontology database Released 2019-07-03
Analyzed List:	upload_1 (Arabidopsis thaliana)
Reference List:	Arabidopsis thaliana (all genes in database)
Test Type:	FISHER
Correction:	BONFERRONI
Bonferroni count:	2777
GO biological process complete	Arabidopsis thaliana - REFLIST (27581)	upload_1 (287)	upload_1 (expected)	upload_1 (over/under)	upload_1 (fold Enrichment)	upload_1 (P-value)
ribosomal large subunit assembly (GO:0000027)	42	10	0.44	+	22.88	3.44e-07
cytoplasmic translation (GO:0002181)	66	12	0.69	+	17.47	7.45e-08
translational elongation (GO:0006414)	68	12	0.71	+	16.96	1.02e-07
ribosomal large subunit biogenesis (GO:0042273)	94	16	0.98	+	16.36	8.58e-11
ribosome assembly (GO:0042255)	85	14	0.88	+	15.83	5.3e-09
translation (GO:0006412)	562	73	5.85	+	12.48	1.82e-51
peptide biosynthetic process (GO:0043043)	567	73	5.9	+	12.37	3.21e-51
amide biosynthetic process (GO:0043604)	639	74	6.65	+	11.13	5.21e-49
peptide metabolic process (GO:0006518)	646	73	6.72	+	10.86	1.38e-47
cellular amide metabolic process (GO:0043603)	784	74	8.16	+	9.07	2.97e-43
ribonucleoprotein complex assembly (GO:0022618)	180	15	1.87	+	8.01	5.63e-06
organelle assembly (GO:0070925)	181	15	1.88	+	7.96	6.04e-06
ribonucleoprotein complex subunit organization (GO:0071826)	189	15	1.97	+	7.63	1.05e-05
ribosome biogenesis (GO:0042254)	361	25	3.76	+	6.66	9.98e-10
organonitrogen compound biosynthetic process (GO:1901566)	1407	90	14.64	+	6.15	7.02e-41
cellular nitrogen compound biosynthetic process (GO:0044271)	1253	80	13.04	+	6.14	1.55e-35
cellular macromolecule biosynthetic process (GO:0034645)	1271	77	13.23	+	5.82	1.69e-32
macromolecule biosynthetic process (GO:0009059)	1327	78	13.81	+	5.65	3.89e-32
ribonucleoprotein complex biogenesis (GO:0022613)	452	26	4.7	+	5.53	1.75e-08
gene expression (GO:0010467)	1630	84	16.96	+	4.95	4.49e-31
organic substance biosynthetic process (GO:1901576)	2717	107	28.27	+	3.78	1.9e-31
cellular biosynthetic process (GO:0044249)	2646	104	27.53	+	3.78	2.97e-30
biosynthetic process (GO:0009058)	2883	108	30	+	3.6	5.86e-30
cellular nitrogen compound metabolic process (GO:0034641)	3009	97	31.31	+	3.1	2.99e-21
cellular protein metabolic process (GO:0044267)	3323	99	34.58	+	2.86	2.56e-19
protein metabolic process (GO:0019538)	3671	103	38.2	+	2.7	1.99e-18
organonitrogen compound metabolic process (GO:1901564)	4794	123	49.88	+	2.47	4.16e-20
cellular macromolecule metabolic process (GO:0044260)	4369	107	45.46	+	2.35	5.89e-15
nitrogen compound metabolic process (GO:0006807)	6408	135	66.68	+	2.02	6.98e-15
macromolecule metabolic process (GO:0043170)	5717	120	59.49	+	2.02	3.04e-12
primary metabolic process (GO:0044238)	7539	154	78.45	+	1.96	3.44e-17
organic substance metabolic process (GO:0071704)	8252	160	85.87	+	1.86	5.02e-16
cellular metabolic process (GO:0044237)	8032	155	83.58	+	1.85	6.19e-15
cellular component organization or biogenesis (GO:0071840)	3126	59	32.53	+	1.81	0.0247
metabolic process (GO:0008152)	9550	169	99.37	+	1.7	2.42e-13
cellular process (GO:0009987)	11519	188	119.86	+	1.57	2.86e-12
Unclassified (UNCLASSIFIED)	5110	41	53.17	-	0.77	0
