# Supplementary material for: Functional categorization of de novo transcriptome assembly of Vanilla planifolia Jacks. potentially points to a translational regulation during early stages of infection by Fusarium oxysporum f. sp. vanillae
Source: BMC Genomics. 2019 Nov 8;20:826. doi: 10.1186/s12864-019-6229-5 (PMC6839141; doi:10.1186/s12864-019-6229-5)
Supplement: Supplementary file 9 — Additional file 9: Table S6. GO terms enrichment analysis, performed with the PANTHER classification system software (v.14.0). Gene Ontology categories significantly enriched in DEGs at 2 dpi, present in transcripts down regulated, in the infection caused by Fusarium in vanilla. In the table the Gene Ontology (GO) terms that are significantly (q ≤ 0.05) overrepresented using are observed. [file 12864_2019_6229_MOESM9_ESM.xlsx]

## Sheet: analysis (3)
Analysis Type:	PANTHER Overrepresentation Test (Released 20190711)
Annotation Version and Release Date:	GO Ontology database Released 2019-07-03
Analyzed List:	upload_1 (Arabidopsis thaliana)
Reference List:	Arabidopsis thaliana (all genes in database)
Test Type:	FISHER
Correction:	BONFERRONI
Bonferroni count:	2777
GO biological process complete	Arabidopsis thaliana - REFLIST (27581)	upload_1 (260)	upload_1 (expected)	upload_1 (over/under)	upload_1 (fold Enrichment)	upload_1 (P-value)
pre-replicative complex assembly involved in nuclear cell cycle DNA replication (GO:0006267)	7	4	0.07	+	60.62	0.00647
pre-replicative complex assembly involved in cell cycle DNA replication (GO:1902299)	7	4	0.07	+	60.62	0.00647
pre-replicative complex assembly (GO:0036388)	7	4	0.07	+	60.62	0.00647
DNA replication initiation (GO:0006270)	20	6	0.19	+	31.82	0.000342
plant-type cell wall modification (GO:0009827)	60	7	0.57	+	12.38	0.00856
plant-type cell wall organization (GO:0009664)	134	10	1.26	+	7.92	0.00302
DNA-dependent DNA replication (GO:0006261)	108	8	1.02	+	7.86	0.0384
DNA replication (GO:0006260)	134	9	1.26	+	7.12	0.0234
cell wall modification (GO:0042545)	167	11	1.57	+	6.99	0.00279
plant-type cell wall organization or biogenesis (GO:0071669)	247	16	2.33	+	6.87	1.18e-05
cell wall biogenesis (GO:0042546)	233	13	2.2	+	5.92	0.00173
cell wall organization (GO:0071555)	524	29	4.94	+	5.87	2.02e-10
external encapsulating structure organization (GO:0045229)	561	29	5.29	+	5.48	1.02e-09
cell wall organization or biogenesis (GO:0071554)	669	34	6.31	+	5.39	1.29e-11
cell division (GO:0051301)	352	15	3.32	+	4.52	0.00605
polysaccharide metabolic process (GO:0005976)	451	18	4.25	+	4.23	0.00144
cellular carbohydrate metabolic process (GO:0044262)	417	15	3.93	+	3.82	0.0427
cell cycle (GO:0007049)	554	18	5.22	+	3.45	0.0232
carbohydrate metabolic process (GO:0005975)	983	27	9.27	+	2.91	0.00293
cellular component organization (GO:0016043)	2803	54	26.42	+	2.04	0.00136
cellular component organization or biogenesis (GO:0071840)	3126	60	29.47	+	2.04	0.000323
cellular process (GO:0009987)	11519	152	108.59	+	1.4	0.000244
Unclassified (UNCLASSIFIED)	5110	37	48.17	-	0.77	0
